1 **Mechanisms of a locally adaptive shift in allocation among growth, reproduction, and**  
2 **herbivore resistance in *Mimulus guttatus***

3

4

5 David B. Lowry<sup>a,b,c</sup>, Damian Popovic<sup>a,b</sup>, Darlene J. Brennan<sup>a</sup>, Liza M. Holeski<sup>d</sup>

6

7 <sup>a</sup>Department of Plant Biology, Michigan State University, East Lansing, MI, USA

8 <sup>b</sup>Program in Ecology, Evolutionary Biology and Behavior, Michigan State University, East

9 Lansing, MI 48824, USA

10 <sup>c</sup>Plant Resilience Institute, Michigan State University, East Lansing, MI 48824, USA

11 <sup>d</sup>Department of Biological Sciences, Northern Arizona University, Flagstaff, AZ, 86011

12

13

14

15

16

17

18

19 **Key Words:** Chromosomal Inversion, Ecotype, Gibberellin, *Mimulus guttatus*, Supergene,

20 Trade-offs

21

22

23

24 **ABSTRACT**

25 Environmental gradients can drive adaptive evolutionary shifts in plant resource allocation  
26 among growth, reproduction, and herbivore resistance. However, few studies have attempted to  
27 connect these adaptations to the underlying physiological and genetic mechanisms. Here, we  
28 evaluate potential mechanisms underlying a coordinated locally adaptive shift between growth,  
29 reproduction, and herbivore defense in the yellow monkeyflower, *Mimulus guttatus*. Through  
30 manipulative laboratory experiments we found that gibberellin (GA) growth hormones may play  
31 a role in the developmental divergence between coastal perennial and inland annual ecotypes of  
32 *M. guttatus*. Further, we detected an interaction between a locally adaptive chromosomal  
33 inversion, *DIVI*, and GA addition. This finding is consistent with the inversion contributing to  
34 the evolution of growth form via an interaction with the GA pathway. Finally, we found  
35 evidence that the *DIVI* inversion is partially responsible for a coordinated shift in the divergence  
36 of growth, reproduction, and herbivore resistance traits between coastal perennial and inland  
37 annual *M. guttatus*. The inversion has already been established to have a substantial impact on  
38 the life-history shift between long-term growth and rapid reproduction in this system. Here, we  
39 demonstrate that the *DIVI* inversion also has sizable impacts on both the total abundance and  
40 profile of phytochemical compounds involved in herbivore resistance.

41

42

43

44

45

46

47 **INTRODUCTION**

48 One of the fundamental tenants of evolutionary biology is that adaptation of organisms to  
49 specific environmental conditions inevitably results in a fitness trade-off. Trade-offs often  
50 manifest in the form of a cost, such that organisms that become adapted to one set of  
51 environmental conditions will be at a disadvantage in alternative environments (Futuyma and  
52 Moreno 1988; Whitlock 1996). The idea of trade-offs involved in adaptation and ecological  
53 specialization has been borne out in a wide range of evolutionary scenarios, including predator-  
54 prey relationships and host-races formation in insect herbivores (Futuyma and Moreno 1988;  
55 Kawecki 1998; Svanback and Eklov 2003; Forister et al. 2012). A common source of ecological  
56 specialization and consequent trade-offs is the process of local adaptation across environmental  
57 gradients (Kawecki and Ebert 2004; Hereford 2009).

58  
59 Local adaption across environmental gradients can lead to shifts in the allocation of resources to  
60 long-term growth (survival) and reproduction (fecundity; Clausen and Hiesey 1958; Lowry  
61 2012; Friedman and Rubin 2015). Those shifts in life-history strategy along environmental  
62 gradients can also have major impacts on allocation to herbivore defense (Hahn and Maron  
63 2016). However, there appears to be key differences in how resources are allocated across  
64 environmental gradient for interspecific and intraspecific comparisons. Interspecific variation in  
65 plant species typically fits well with the resource allocation hypothesis (Coley et al. 1985), where  
66 low resource environments tend to be composed of slower growing better defended species while  
67 high resource environments promote faster growing poorly defended plants (Endara and Coley  
68 2011). In contrast, intraspecific variation along environmental gradients is far less consistent and  
69 more often than not contradicts the predictions of the resource allocation hypothesis (Hahn and

70 Maron 2016). One common pattern for intraspecific plant variation is a positive relationship  
71 between the length of the growing season along an environmental gradient and the level of  
72 herbivore resistance (Hahn and Maron 2016; Kooyers et al. 2017). This pattern could be driven  
73 by plants having more time to allocate resources to leaf production and defense, greater  
74 herbivore pressure in habitats with longer growing seasons, and/or a greater apparency of plants  
75 with longer growing seasons (Feeny 1976; Mason and Donovan 2015; Hahn and Maron 2016;  
76 Kooyers et al. 2017). Allocation to reproduction (fecundity) frequently trades off with  
77 constitutive and/or induced herbivore resistance (Agren and Schemske 1993; Heil and Baldwin  
78 2002; Strauss et al. 2002; Stowe and Marquis 2011; Cipollini et al. 2014).

79

80 Achieving an evolutionary optimum in how resources are allocated to growth, reproduction, and  
81 defense will depend on the nature of all environmental challenges faced by each local population  
82 (Rhoades 1979; Rausher 1996; Hamilton et al. 2001; Strauss et al. 2002; Stamp 2003; Karban  
83 2011; Cipollini et al. 2014; Jensen et al. 2015; Smilanich et al. 2016). Despite the development  
84 of multiple ecological and evolutionary hypotheses that postulate a relationship between growth,  
85 reproduction, and resistance to herbivores (Feeny 1976; Coley et al. 1985; Rhoades 1979; Herms  
86 and Mattson 1992; Strauss et al. 2002; Stamp 2003, Fine et al. 2006; Agrawal et al. 2010;  
87 Cipollini et al. 2014; Hahn and Maron 2016), these hypotheses do not make any predictions  
88 about the underlying molecular mechanisms that mediate these relationships. The genetic  
89 mechanisms responsible for trade-offs among growth, reproduction, and resistance are just  
90 beginning to be elucidated in model systems (Lorenzo et al. 2004; Yang et al. 2012; Kerwin et al.  
91 2015; Campos et al. 2016; Havko et al. 2016; Major et al. 2017; Howe et al. 2018; Rasmann et  
92 al. 2018), but have yet to be evaluated in the evolutionary context of local adaptation.



93 Recent studies have shown that changes in the allocation of resources to growth versus resistance  
94 are made through a set of interacting gene networks (Karzan and Manners 2012; Huot et al.  
95 2014; Campos et al. 2016; Havko et al. 2016). Jasmonates (JA) are key regulatory hormones  
96 involved in the response of plants to herbivore attack (Zhang and Turner 2008; Havko et al.  
97 2016). While JA production increases herbivore defenses, it also inhibits plant growth through  
98 interactions with other gene networks (Zhang and Turner 2008; Yan et al. 2007; Karzan and  
99 Manners 2012; Yang et al. 2012). For example, the interactions of JAZ genes with DELLA  
100 genes in the signaling pathway of Gibberellin (GA) growth hormones are thought to play a key  
101 role in mediating resource allocation (Yang et al. 2012; Hou et al. 2013; Havko et al. 2016).

102

103 Here, we focus on understanding the physiological and genetic mechanisms underlying shifts in  
104 allocation to growth, reproduction, and defense for local adapted populations of the yellow  
105 monkeyflower *Mimulus guttatus*. The availability of soil water is a key driver of local adaptation  
106 in the *M. guttatus* species complex (Hall and Willis 2006; Lowry et al. 2008; Ferris et al. 2017).  
107 The coastal habitats of California and Oregon have many wet seeps and streams that are  
108 maintained year-round as a result of persistent summer oceanic fog and cool temperatures (Hall  
109 and Willis 2006; Lowry et al. 2008; Lowry and Willis 2010). All coastal populations of *M.*  
110 *guttatus* that reside in those habitats have a late-flowering life-history strategy. These coastal  
111 perennial populations thus, make a long-term investment in growth over reproduction (Hall and  
112 Willis 2006; Lowry et al. 2008; Hall et al. 2010; Baker and Diggle 2011; Baker et al. 2012). That  
113 investment in growth manifests through the production of many vegetative lateral stolons,  
114 adventitious roots, and leaves in coastal perennial plants. In contrast, the vast majority of nearby  
115 inland populations of *M. guttatus* in the coastal mountain ranges reside in habitats that dry out

116 completely during summer months. These inland populations have evolved a rapid growth  
117 drought escape annual life-history strategy. Instead of investing in vegetative lateral stolons, the  
118 axillary branches of inland plants are mostly upcurved and typically produce flowers quickly  
119 (Lowry et al. 2008; Lowry and Willis 2010; Friedman et al. 2015). Further, inland plants invest  
120 less into the production of leaves before flowering than coastal perennials (Friedman et al. 2015).  
121 It should be noted that a smaller number of inland populations in the Coast Ranges do reside in  
122 rivers and perennial seeps and have a perennial life-history. Farther inland, perennial  
123 populations are more common, especially in high elevation streams and hot springs of the Sierra  
124 and Cascade Mountains (Oneal et al. 2014).

125

126 While perennial populations invest more into vegetative growth than reproductive growth, they  
127 also invest more heavily in defending their vegetative tissues. Perennial populations have higher  
128 levels of both constitutive and induced defensive phenylpropanoid glycoside (PPG) compounds  
129 than the annual populations when grown in a common environment (Holeski et al. 2013). This  
130 pattern of highly defended plants in wetter habitats with long growing seasons versus poorly  
131 defended plants in dry habitats with short growing seasons is consistent with an optimal defense  
132 strategy: Greater allocation of resources to herbivore resistance is favored in long growing  
133 season habitats by a greater abundance of herbivores and a lower cost of producing defensive  
134 compounds (Kooyers et al. 2017).

135

136 Two major QTLs (*DIV1* and *DIV2*) and many minor QTLs control key traits involved in local  
137 adaptation to perennial and annual habitats within the *M. guttatus* species complex (Hall et al.  
138 2006; Lowry and Willis 2010; Hall et al. 2010; Friedman and Willis 2013; Friedman et al. 2015).

139 *DIVI* has the largest effect on the most traits and has thus been more extensively studied than  
140 *DIV2*. *DIVI* is a large paracentric chromosomal inversion that plays a pivotal role in the annual  
141 versus perennial life-history divergence described above (Lowry and Willis 2010). The inversion  
142 is at minimum 6.3 Mbp in length along linkage group 8 (LG8) and contains at least 785  
143 annotated genes. In hybrids, *DIVI* has a major effect on growth rate including the adaptive  
144 flowering time phenotype, explaining 21% to 48% of the divergence between inland annual and  
145 coastal perennial parents (Lowry and Willis 2010). In addition to flowering time, the *DIVI*  
146 inversion has major effects on multiple traits involved in the evolutionary shift from more  
147 allocation of resources to long-term growth versus reproduction (Lowry and Willis 2010). These  
148 traits include the production of lateral stolons, adventitious roots, and leaf size (Lowry and Willis  
149 2010; Friedman et al. 2015). Recent outlier analysis of coastal perennial and inland annual  
150 populations identified candidate genes in the gibberellin pathway that may underlie a pleiotropic  
151 shift in allocation between growth and reproduction (Gould et al. 2017).

152  
153 In this study, we evaluate the role of GA in the divergence of growth morphology and herbivore  
154 resistance between perennial and annual ecotypes of *M. guttatus*. We then test whether there is  
155 an interaction between the *DIVI* inversion and GA addition, which would be consistent with the  
156 inversion contributing to the evolution of shifts in allocation between long-term growth and  
157 reproduction via effects on the GA pathway. Finally, we examined whether the *DIVI* inversion is  
158 responsible for the shift in allocation between reproduction and defense that has been broadly  
159 observed for populations of *M. guttatus* that vary in growing season length (Lowry et al. 2008;  
160 Holeski et al. 2013; Kooyers et al. 2017).

161

162 **METHODS**

163

164 ***Plant material***

165 For comparisons among ecotypes, we utilized single family population accessions derived from  
166 five coastal perennial, four inland annual, and two inland perennial populations of *M. guttatus*  
167 (Fig. 1). The locations from where population accessions were collected are listed in Table S1.  
168 Previous population structure analyses found that coastal perennial populations of *M. guttatus*  
169 are more closely related to each other than they are to the inland populations (Lowry et al. 2008;  
170 Twyford and Friedman 2015). Thus, the coastal populations collectively constitute a distinct  
171 locally adapted ecotype (Lowry 2012). In contrast, population structure between inland annuals  
172 and inland perennial populations is generally low (Twyford and Friedman 2015). However,  
173 particular regions of the genome, including an adaptive chromosomal inversion (*DIVI*, discussed  
174 below) are more differentiated between inland annuals and perennials (Oneal et al. 2014;  
175 Twyford and Friedman 2015). We therefore consider inland annuals and inland perennials as  
176 different ecotypes as well.

177

178 To understand the phenotypic effects of the *DIVI* inversion, Lowry and Willis (2010) previously  
179 created near-isogenic lines (NILs). The NILs are the product of crosses between inbred lines  
180 from the coastal perennial SWB population and the nearby inland annual LMC population. F1  
181 hybrids were recurrently backcrossed to both of their respective parents for four generations.  
182 Heterozygous fourth generation backcrosses were then self-fertilized to produce two types of  
183 NILs: 1) Individuals that were homozygous for the introgressed allele of *DIVI* (Introgression-  
184 NILs) and 2) Individuals that were homozygous for the *DIVI* allele of the genetic background

185 (henceforth referred to as Control-NILs). Comparisons between Introgression-NILs and Control-  
186 NILs are ideal for testing inversion function because their genetic backgrounds are nearly  
187 identical, but they are homozygous for opposite *DIVI* alleles.

188

### 189 ***The effects of GA application on plant growth among ecotypes***

190 To evaluate whether coastal perennial and inland annual plants differ in their response to GA  
191 addition, we conducted a greenhouse experiment with accessions derived from five coastal and  
192 four inland populations. Seeds were sown in Suremix soil (Michigan Grower Products Inc.,  
193 Galsburg, MI) and stratified at 4° C for two weeks. After stratification, pots were moved to the  
194 Michigan State University Greenhouses. Temperature was set in the greenhouse room to 22° C  
195 days/18° C nights. Plants were grown in 16-hour days and 8-hour nights, where supplemental  
196 lighting was used during the full day period. Seedlings were transplanted to individual 3.5-inch  
197 square pots filled with Suremix soil. Transplanted seedlings were randomized across the  
198 experiment and randomly assigned to a GA treatment group or a mock control group. After  
199 transplantation, plants were sprayed five times each, every other day, with 100mM GA3 (GA  
200 treatment) or DI water (mock). This spray volume amounts to ~3.5 mL of volume.

201

202 To standardize the developmental time point at which plant traits were quantified, we measured  
203 the following traits on the day of first flowering (anthesis): Total number of nodes on the primary  
204 shoot, lengths and widths of the first three internodes, length and width of the corolla of the first  
205 open flower, plant height, the total number of adventitious roots at the first node of all branches,  
206 total number of stoloniferous nodes sprouting adventitious roots, total number of aerial branches,  
207 total number of stolons, length of the longest aerial branch, length of the longest stolon, and the

208 length and width of the longest leaf at the second node. Ten days after first flower, we quantified  
209 the same traits as at first flower, with the following exceptions: Length and width of corollas  
210 were not quantified, but we did count the total number of flowers.

211  
212 Results were analyzed with JMP 12.2.0 (SAS Institute, Cary, NC). To gain a general  
213 understanding of the effect of GA addition on coastal perennial, inland annual, and inland  
214 perennial ecotypes, we conducted principle components analyses using all traits measured 10  
215 days after flowering plus the width and length of corollas measured at flowering. We did not use  
216 the other traits measured at first flower to avoid including repeated measures in the principle  
217 components analysis. We saved the first three PCs from the analysis of all individuals. To  
218 understand the effects of accession, ecotype, and GA treatment on PCs, we fit standard least  
219 squares models. Each of the three PCs were modeled as response variables to the following  
220 factors and interactions: accession (nested within ecotype), ecotype (coastal perennial, inland  
221 annual, inland perennial), treatment, accession x treatment, and ecotype x treatment. Following  
222 our PC analysis, we fit the same model for individual traits.

223

#### 224 ***Interactions of GA application with the adaptive DIV1 inversion***

225 We grew coastal (S1) and inland (L1) parental inbred lines along with the NILs derived from  
226 those lines in a fully randomized design in the Michigan State University greenhouses, with 16-  
227 hours of supplemental lighting. We focused on the effect of the inversion in the coastal perennial  
228 genetic background, as a previous study had shown that the effect of the inversion had the  
229 greatest effect in the perennial genetic background (Friedman 2014). Following transplantation,

230 seedlings were sprayed with GA or a mock water treatment every other day and traits were  
231 quantified in the same way as for the comparing population accessions.

232

233 To establish how trait variation of the coastal and inland parental lines was influenced by the GA  
234 treatment, we conducted a PC analysis with the parental lines. As for the analysis with multiple  
235 population accessions (above), we conducted principle components analyses using all traits  
236 measured 10 days after flowering plus the width and length of corollas measured at flowering.

237 Models were fit with the first three PCs and individual traits as response variables to the  
238 following factors: line, treatment, and the line x treatment interaction. Following analysis of the  
239 parental lines, we analyzed the effects of the inversion in the perennial genetic background NILs.

240 As above, we first conducted a PC-based analysis and saved the first three PCs. We then fit the  
241 first three PCs and individual traits as response variables for the following factors: inversion  
242 type, treatment, and the inversion type x treatment interaction.

243

#### 244 ***Effects of the *DIV1* inversion on resistance compound concentrations***

245 To evaluate the effects of the *DIV1* inversion on the production of herbivore resistance  
246 compounds, we conducted an experiment using the inversion NILs. Seeds were stratified,  
247 germinated, and transplanted following the same protocols as in the previous two experiments. In  
248 contrast to the GA NIL experiment, we grew outbred NILs which were created by intercrossing  
249 independently derived NILs. As for the GA experiment, we focused our study on the effect of the  
250 inversion in the perennial genetic background. The details of how outbred NILs were generated  
251 can be found in Lowry and Willis (2010). Here, we used the outbred NILs made by intercrossing

252 S2 and S3 derived coastal genetic background NILs. We used intercrosses between L2 and L3  
253 for the inland parents and between S2 and S3 for the coastal perennial parent comparisons.  
254  
255 To ensure that enough leaf tissue was available for analyses, outbred NILs and outbred parents  
256 were allowed to flower prior to the collections for PPG quantification. Collected leaf tissue was  
257 lyophilized for two days and then shipped to Northern Arizona University for analyses. We  
258 ground the leaf tissue using a 1600 MiniG (Spex, Metuchen, New Jersey). Extractions were  
259 conducted in methanol, as described in Holeski et al. 2013, 2014. We quantified PPGs using high  
260 performance liquid chromatography (HPLC), via an Agilent 1260 HPLC (Agilent Technologies,  
261 Santa Clara, California) with a diode array detector and Poroshell 120 EC-C18 analytical column  
262 (4.6 x 250mm, 2.7 $\mu$ m particle size) maintained at 30°C. HPLC run conditions, as were described  
263 in Kooyers et al. (2017). We calculated concentrations of PPGs as verbascoside equivalents,  
264 using a standard verbascoside solution (Santa Cruz Biotechnology, Dallas, Texas), as described  
265 in Holeski et al. (2013, 2014). We compared the concentrations of total PPGs and individual  
266 PPGs with one-way ANOVAs fit in JMP 12.2.0. Post-hoc Tukey Tests were used to compare  
267 means of parental and NIL classes.

268

## 269 **RESULTS**

### 270 *The effects of GA application on plant growth among ecotypes*

271 Consistent with previous studies (Hall et al. 2006; Lowry et al. 2008; Lowry and Willis 2010;  
272 Oneal et al. 2014), there were large differences in morphology between coastal perennial, inland  
273 annual, and inland perennial ecotypes. There were also differences between the inland perennial  
274 ecotype and the two other ecotypes. Most traits (18 out of 20) heavily loaded (Loadings > 0.40)



275 onto the first PC (Eigenvalue = 8.258; Table S2). The ecotype effect was highly significant for  
276 PC1 ( $F_{2,226} = 333.64$ ,  $P < 0.0001$ ; Table 1). Within ecotype, there was a significant effect of  
277 accession on PC1 ( $F_{8,226} = 20.12$ ,  $P < 0.0001$ ), and there was a significant effect of the GA  
278 treatment on PC1 ( $F_{1,226} = 25.75$ ,  $P < 0.0001$ ). While there was a significant accession x  
279 treatment effect on PC1 ( $F_{8,226} = 3.36$ ,  $P = 0.0012$ ), the treatment x ecotype effect was not  
280 significant ( $P > 0.05$ ). In contrast to PC1, both of the interactions were significant for PC2  
281 (Eigenvalue = 3.463; accession x treatment:  $F_{8,226} = 8.18$ ,  $P < 0.0001$ ; ecotype x treatment:  $F_{2,226}$   
282 = 6.20,  $P = 0.0024$ ; Fig. 2A) and PC3 (Eigenvalue = 2.01; accession x treatment:  $F_{8,226} = 2.92$ ;  $P$   
283 = 0.0040, ecotype x treatment:  $F_{2,226} = 41.64$ ,  $P < 0.0001$ ; Fig. 2B). Second and third internode  
284 length, plant height, the total number of adventitious roots at the first nodes, total number of  
285 stoloniferous nodes sprouting adventitious roots, total number of aerial branches, total number of  
286 stolons, and the length of the longest aerial branch all heavily loaded ( $> 0.40$ ) onto PC2 (Table  
287 S2). Third internode length, total number of aerial branches, total number of stolons, and leaf  
288 width heavily loaded onto PC3 (Table S2).

289  
290 The results of the individual traits analyses were largely consistent with the principle  
291 components analyses. Ecotype had a significant effect on all traits except for third internode  
292 length. There was a significant accession effect for every trait that we measured in the  
293 experiment. The GA treatment had a significant effect on 16 out of 19 traits at first flower and 12  
294 out of 18 traits measured at 10 days after first flower (Table 1). The most pronounced changes of  
295 the plants in response to the GA treatment was an increase in plant height and a conversion of  
296 lateral branches from adventitious root-making stolon branches into uncurved aerial branches  
297 (Fig. 2C). As the perennials typically have more stolons with adventitious roots than the annuals,

298 they were generally more obviously affected by the GA treatment. This effect was captured  
299 through the significant ecotype x treatment interactions on plant height. It should be noted that  
300 the effect of GA varied across accessions within ecotype. The coastal PGR accession is the  
301 tallest coastal accession with the fewest stolons (Table 1; Fig. 2C). Thus, it was affected the least  
302 by the GA treatment. In contrast, OPB is a short prostrate coastal accession and was dramatically  
303 affected by the GA treatment (Fig. 2C). Among the inland annual accession, SWC showed the  
304 greatest response to the GA treatment in terms of height and aerial branch formation.

305

### 306 ***Interactions of GA application with the adaptive DIV1 inversion***

307 Consistent with previous studies (Lowry and Willis 2010; Friedman 2014), the coastal perennial  
308 (SWB S1) and inland annual (LMC L1) lines were highly divergent in morphological traits and  
309 the two lines were differentiated strongly along PC1 ( $F_{1,168} = 416.81$ ,  $P < 0.0001$ ). Similar to the  
310 accession analyses (above), the line x treatment interaction was not significant for PC1, but was  
311 highly significant for PC2 ( $F_{1,168} = 85.57$ ,  $P < 0.0001$ ) and PC3 ( $F_{1,168} = 13.54$ ,  $P < 0.0001$ ). The  
312 line x treatment interactions was also significant for 16 out of the 19 traits measured at flowering  
313 and 12 out of the 18 traits measured 10 days after flowering. Overall, the coastal perennial line  
314 (S1) responded more strongly to GA treatment, just as we found across coastal and inland  
315 populations more generally (above).

316

317 The *DIV1* chromosomal inversion is one of many loci responsible for divergence between the  
318 annual and perennial ecotypes. Thus, main effects and interactions in the NILs were expected to  
319 be subtler than for the parental lines. As in previous studies (Lowry and Willis 2010; Friedman  
320 2014), the inversion had significant effects on morphology, with highly significant main effects

321 on PC1 ( $F_{1,173} = 35.44$ ,  $P < 0.0001$ ; Table 2, S3) and PC3 ( $F_{1,173} = 37.55$ ,  $P < 0.0001$ ). The GA  
322 treatment had significant effects on PC1 ( $F_{1,173} = 16.76$ ,  $P < 0.0001$ ) and PC2 ( $F_{1,173} = 489.50$ ,  $P$   
323  $< 0.0001$ ). There were weak, but significant, line x treatment interactions for PC2 ( $F_{1,173} = 4.13$ ,  
324  $P = 0.0437$ ; Fig. 3A) and PC3 ( $F_{1,173} = 4.17$ ,  $P = 0.0427$ ). While the line x treatment effect on the  
325 morphological PCs was marginal, the effect was greater for some of the individual traits (Fig. 3;  
326 Table 2).

327

### 328 ***Effects of the *DIVI* inversion on resistance compound concentrations***

329 We quantified the concentrations of seven PPGs (Table 3). Consistent with our previous  
330 observations (Holeski et al. 2013), the coastal perennial parental (SWB) plants produced 2.5  
331 times more total PPGs than the inland annual parental (LMC) plants ( $F_{1,31} = 51.03$ ;  $P < 0.0001$ ;  
332 Table 3; Fig. 4). There were also significant differences for six out of seven of the PPGs between  
333 the coastal perennial (SWB) and inland annual (LMC) parental lines.

334

335 Analysis of the *DIVI* NILs revealed that the introgressed region containing the inversion had  
336 major effects on foliar concentrations of PPGs. Control NILs that were homozygous for the  
337 coastal orientation of the *DIVI* inversion produced 35% higher concentrations of total PPGs than  
338 the introgression NILs, which were homozygous for the inland *DIVI* orientation ( $F_{1,87} = 22.70$ ;  $P$   
339  $< 0.0001$ ). In addition, the *DIVI* locus had significant effects on four out of the seven individual  
340 PPGs. Interestingly, the control NILs had higher concentrations of conandroside and  
341 mimuloside, but lower concentrations of calceolarioside A and unknown PPG10, than the  
342 introgression NILs (Table 3). Thus, the *DIVI* inversion influences both the total concentration of  
343 PPGs as well as the composition of suites of these PPGs.

344

345 **DISCUSSION**

346 In this study, we identified a potential genetic mechanism underlying a coordinated evolutionary  
347 shift between growth, reproduction, and herbivore resistance in the *M. guttatus* species complex.  
348 We found that GA has the potential to play a role in the divergence between coastal perennial  
349 and inland annual ecotypes of *M. guttatus*, with coastal and inland plants responding differently  
350 to the addition of GA for a number of phenotypic traits associated with shifts between long-term  
351 growth and reproduction. Further, we detected an interaction between the locally adaptive *DIVI*  
352 inversion and GA addition, which is consistent with the inversion contributing to the evolution of  
353 growth form by modulating the GA pathway. Finally, we found evidence that the *DIVI* inversion  
354 contributes to the trade-off between growth, reproduction and resistance. The coastal orientation  
355 of the *DIVI* inversion causes plants to allocate more to long-term growth and herbivore  
356 resistance over rapid reproduction than for the inland inversion orientation. We discuss these  
357 findings in the context of the broader literature below.

358

359 ***Environmental gradients and the evolution of growth, reproduction, and defense traits***

360 Studies of intraspecific variation among natural populations adapted to different soil water  
361 availability regimes provide an excellent opportunity to understand how the abiotic environment  
362 influences the relative allocation of resources by plants to growth and constitutive/induced  
363 resistance. Soil water is one of the most limiting factors for plants on Earth (Whittaker 1975;  
364 Bohnert et al. 1995; Bray 1997) and can drastically differ in availability among seasons  
365 (Cowling et al. 1996), which in turn influences plant resource allocation (Juenger 2013). The  
366 timing of soil water availability can dictate the length of the growing season. One major

367 evolutionary strategy for seasonally low water availability is to allocate resources primarily to  
368 growth and reproduction to achieve an early flowering, drought escape life-history (Ludlow  
369 1989; Juenger 2013; Kooyers 2015). Beyond selection on plants, soil moisture gradients can  
370 drive the abundance of herbivores, which in turn exert their own selective pressures (Kooyers et  
371 al. 2017).

372

373 In *M. gutattus*, evolutionary shifts across a soil moisture gradient drives changes in the allocation  
374 not only between growth and reproduction, but also for herbivore resistance (Lowry et al. 2008;  
375 Holeski et al. 2013; Kooyers et al. 2017). The phenotypic differences between coastal perennial  
376 and inland annual populations is likely driven by multiple selective pressures that are tied to the  
377 soil water availability gradient between coastal and inland habitats. Inland annual habitats  
378 generally dry out very quickly at the end of the spring, which leaves little time for a plant to  
379 reproduce before being killed by the summer drought. Further, the short growing season may  
380 also prevent the growth of sizable herbivore populations, which would explain the low level of  
381 leaf damage in fast drying inland annual habitats (Lowry et al. 2008; Kooyers et al. 2017). In  
382 contrast, the year-round soil water availability of coastal habitats means that plants growing there  
383 have much more time to allocate resources to vegetative growth and herbivore resistance. In  
384 addition, wet coastal habitats can build up a considerable load of herbivores, which is likely  
385 reflected by much greater leaf damage and early season mortality in these habitats (Lowry et al.  
386 2008; Lowry and Willis 2010). For intraspecific differences among populations, the strength of  
387 herbivore pressure is thought to be a key driver of plant resistance (Hahn and Maron 2016). It  
388 should be noted that a fair amount of leaf damage in coastal habitats may also be due to oceanic  
389 salt spray (Boyce 1954; Ahmed and Wainwright 1976; Griffiths 2006; Lowry et al. 2009). Future

390 manipulative field experiments are needed to partition out the relative contributions of herbivory  
391 and salt spray to leaf damage for *M. guttatus* in coastal habitats.

392

393 Our findings in *M. guttatus* are likely to have implications for intraspecific variation in many  
394 other plant species as well. There are many studies that have found similar developmental  
395 differences between coastal and inland populations as we have found for *M. guttatus* (reviewed  
396 in Lowry 2012). Given the commonality of coastal plants investing more heavily in lateral  
397 vegetative branches versus inland populations investing primarily in upright flowering branches,  
398 we predict that coastal population of plants will generally be more highly defended than inland  
399 populations, particularly in Mediterranean climates with steep soil moisture gradients.

400

#### 401 ***The role of pleiotropy and linkage***

402 The results of this study and previous studies (Lowry and Willis 2010; Friedman 2014; Friedman  
403 et al. 2015) collectively demonstrate that adaptive chromosomal inversion *DIVI* contributes to  
404 the shift in allocation between long-term growth, short-term fecundity, and herbivore resistance.  
405 An outstanding question is whether this coordinated shift is due to genetic linkage or pleiotropy.  
406 Chromosomal inversions are thought to evolve as adaptation “supergenes,” which can trap  
407 multiple linked adaptive loci through their suppression of meiotic recombination (Dobzhansky  
408 1970; Kirkpatrick and Barton 2006; Schwander et al. 2014; Wellenreuther and Bernatchez 2018).  
409 Thus, the fact that the *DIVI* inversion contributes to the evolution of multiple phenotypes could  
410 be result of adaptive alleles at multiple linked loci being held together in tight linkage by the  
411 chromosomal inversion. Alternatively, a single gene within the inversion could have pleiotropic  
412 effects on all of the phenotypic changes.

413

414 Two other recent studies have also found potential pleiotropic effects of genes on allocation to  
415 reproduction and herbivore resistance. Rasmann et al. (2018) found that NILs containing genetic  
416 variants of the *Flowering Locus C (FLC)* gene in *Cardamine hirsute* are responsible for a trade-  
417 off between early flowering and herbivore resistance in terms of glucosinolate production.  
418 Kerwin et al. (2015) found that there was a positive correlation in *Arabidopsis thaliana* between  
419 glucosinolate production and flowering time for mutant alleles of genes in the glucosinolate  
420 biosynthetic pathway. Overall, both of these studies identified the same trade-off of rapid  
421 reproduction versus herbivore resistance that we found in our study, although mediated through  
422 independent genetic mechanisms.

423

424 ***A hormonal basis of a coordinated shift in the evolution of growth, reproduction, and***  
425 ***herbivore resistance?***

426 The finding that coastal perennial and inland annual plants respond differentially to GA is  
427 consistent with the role of this hormone playing a role in their evolutionary divergence. A recent  
428 outlier analysis of coastal perennial and inland annual populations of *M. guttatus* found that the  
429 gene *GA20-oxidase2 (GA20ox2)* was a major allele frequency outlier between the ecotypes  
430 within the vicinity of the *DIV1* inversion (Gould et al. 2017). This gene is a strong potential  
431 candidate gene for a pleiotropic shift in allocation between growth and reproduction. GA-  
432 oxidases are involved in the evolution of dwarfed coastal populations of *A. thaliana* (Barboza et  
433 al. 2013) and played a key role in the development of dwarfed Green Revolution rice and barley  
434 (Sasaki et al. 2002; Jia et al. 2009). Further, the DELLA gene, *GAI*, is located within the vicinity  
435 of another growth regulatory QTL (*DIV2*). *GAI* was also an allele frequency outlier between

436 coastal and inland populations (Gould et al. 2017). Friedman (2014) found that the *DIVI* and  
437 *DIV2* loci interact epistatically. Thus, it would not be surprising if the genetic changes that  
438 underlie both QTL are in the same molecular pathway. Further, the negative antagonism between  
439 the GA and JA hormone pathways via the DELLA-JAZ signaling node (Havko et al. 2016; Guo  
440 et al. 2018; Howe et al. 2018) suggests a direct mechanism by which trade-offs between growth,  
441 reproduction, and resistance could easily evolve. Future functional genetic studies will be needed  
442 to determine whether these genes in fact are involved in adaptive shifts between growth,  
443 reproduction, and defense underlying local adaptation in this system.

444  
445 While we saw a greater response to GA addition in coastal plants and observed an interaction  
446 between GA addition and the inversion, other hormones could also play a role or even be the  
447 ultimate cause of the divergence between the coastal perennial and inland annual ecotypes. Three  
448 major classes of hormones, Auxins, Brassinosteroids and Gibberellins, are all associated with  
449 growth phenotypes like those that differ between coastal perennial and inland annual ecotypes of  
450 *M. guttatus* (Ross and Quittenden 2016; Unterholzner et al. 2016). These hormones interact in  
451 multiple ways, which have yet to be fully elucidated, to result in shifts in growth/reproduction  
452 phenotypes. Future functional studies in *M. guttatus* will be needed to identify the ultimate  
453 causative mechanisms underlying the dramatic shift in allocation between annual and perennial  
454 populations.

455  
456 ***Conclusions and future directions***

457 There are numerous evolutionary and ecological models that make predictions on the evolution  
458 of relationships between growth, reproduction, and herbivore resistance. While recent meta-



459 analyses have found that some models have moderate support (Endara and Coley 2011), there  
460 are numerous exceptions and many models appear to not be well supported at all (Stamps et al.  
461 2003; Hahn and Maron 2016; Smilanich et al. 2016). The reasons that these models do not hold  
462 up are often attributed to vast variation in the extrinsic environmental factors that exert selective  
463 pressures on plant populations, broad variation in life-history among plant species, and  
464 differences between interspecific and intraspecific variation (Stamps et al. 2003; Hahn and  
465 Maron 2016; Smilanich et al. 2016). Less well appreciated are the molecular genetic mechanisms  
466 that underlie shifts in allocation between growth, reproduction, and herbivore resistance (Kerwin  
467 et al. 2015; Rasmann et al. 2018). The nature of the gene networks responsible for shifts in  
468 allocation may also be very important for whether or not particular systems will conform to a  
469 given evolutionary or ecological model. Future research should focus on uncovering the  
470 molecular mechanisms that underlie the evolution of growth, reproduction, and defense trade-  
471 offs in natural populations and integrate predictions from those mechanisms into ecological  
472 models.

473

#### 474 **AKNOWLEDGEMENT**

475 We would like to thank Sol Chavez for assisting with the quantification of PPGs. Seed  
476 collections were originally made possible by permission from the state parks of Oregon and  
477 California. Funding for this research was provided by Michigan State University through a  
478 startup package to DBL.

479

#### 480 **LITERATURE CITED**

481 Agrawal, A. A., J. K. Conner, and S. Rasmann. 2010. Tradeoffs and adaptive negative  
482 correlations in evolutionary ecology. Pp. 243-268 in M. A. Bell, et al., eds. *Evolution after*  
483 *Darwin: The first 150 years*. Sinaur Press, Sunderland, MA.

484

485 Agren, J., and D. W. Schemske. 1993. The cost of defense against herbivores: an experimental  
486 study of trichome production in *Brassica rapa*. *Am. Nat.* **141**:338-350.

487

488 Ahmad, I., and S. E. Wainwright. 1976. Ecotype differences in leaf surface properties of *Agrostis*  
489 *stolonifera* from salt marsh, spray zone and inland habitats. *New Phytol.* **76**:361-366.

490

491 Baker, R. L., and P. K. Diggle. 2011. Node-specific branching and heterochronic changes  
492 underlie population-level differences in *Mimulus guttatus* (Phrymaceae) shoot architecture. *Am.*  
493 *J. Bot.* **98**:1924-1934.

494

495 Baker, R. L., L. C. Hileman, and P. K. Diggle. 2012. Patterns of shoot architecture in locally  
496 adapted populations are linked to intraspecific differences in gene regulation. *New Phytol.*  
497 **196**:271-281.

498

499 Barboza, L., S. Effgen, C. Alonso-Blanco, R. Kooke, J. J B. Keurentjes, M. Koornneef, and R.  
500 Alcázar. 2013. *Arabidopsis* semidwarfs evolved from independent mutations in GA20ox1,  
501 ortholog to green revolution dwarf alleles in rice and barley. *Proc. Natl. Acad. Sci.* 201314979.

502

- 503 Bohnert, H. J., Nelson D. E., and Jensen R. G. 1995. Adaptations to environmental stresses. *Plant*  
504 *Cell* **7**:1099–1111.
- 505
- 506 Boyce, S. G. 1954. The salt spray community. *Ecol. Monograph*. **24**:29–67.
- 507
- 508 Bray, E. A. 1997. Plant responses to water deficit. *Trends Plant Sci.* **2**:48–54.
- 509
- 510 Campos, M. L., Y. Yoshida, I. T. Major, D. de Oliveira Ferreira, S. M. Weraduwege, J. E.  
511 Froehlich, B. F. Johnson, D. M. Kramer, G. Jander, T. D. Sharkey, and G. A. Howe. 2016.  
512 Rewiring of jasmonate and phytochrome B signalling uncouples plant growth-defense tradeoffs.  
513 *Nat. Commun.* **7**:12570.
- 514
- 515 Cipollini, D., D. Walters, C. Voelckel. 2014. Costs of resistance in plants: from theory to  
516 evidence. *Annu. Plant Rev.* **47**:263-307.
- 517
- 518 Clausen, J., and W. H. Hiesey. 1958. Experimental studies on the nature of species. IV. Genetic  
519 structure of ecological races. Carnegie Institution of Washington, Washington, DC.
- 520
- 521 Coley, P. D., J. P Bryant, F. F. S. Chapin III. 1985. Resource availability and plant antiherbivore  
522 defense. *Science* **230**:895-899.
- 523
- 524 Cowling, R. M., P. W Rundel., B. B. Lamont, M. K. Arroyo, and M. Arianoutsou. 1996. Plant  
525 diversity in Mediterranean-climate regions. *Trends Ecol. Evol.* **11**:362-366.

526

527 Defossez, E., L. Pellissier, and S. Rasmann. 2018. The unfolding of plant growth form-defense  
528 syndromes along elevational gradients. *Ecol. Lett.* **21**:609-618.

529

530 Dobzhansky, T. 1970. *Genetics of the Evolutionary Process*. Columbia University Press, New  
531 York, NY.

532

533 Endara, M. J., and P. D. Coley. 2011. The resource availability hypothesis revisited: A meta-  
534 analysis. *Funct. Ecol.* **25**:389-398.

535

536 Feeny, P. 1976 Plant apparency and chemical defense. Pp. 1-40 in J. W. Wallace and R. L.  
537 Mansell, eds. *Biochemical interaction between plants and insects*. Springer, Boston, MA.

538

539 Ferris, K. G., L. L. Barnett, B. K. Blackman, J. H. Willis. 2017. The genetic architecture of local  
540 adaptation and reproductive isolation in sympatry within the *Mimulus guttatus* species complex.

541 *Mol. Ecol.* **26**:208-224.

542

543 Fine, P. V., Z. J. Miller, I. Mesones, S. Irazuzta, H. M. Appel, M. H. Stevens, I. Sääksjärvi, J. C.  
544 Schultz, and P. D. Coley. 2006. The growth–defense trade-off and habitat specialization by

545 plants in Amazonian forests. *Ecology* **87**:S150-S162.

546

- 547 Forister, M. L., L. A. Dyer, M. S. Singer, J. O. Stireman, and J. T. Lill. 2012. Revisiting the  
548 evolution of ecological specialization, with emphasis on insect–plant interactions. *Ecology*  
549 **93**:981-991.
- 550
- 551 Friedman, J. 2014. Genetic determinants and epistasis for life history trait differences in the  
552 common monkeyflower, *Mimulus guttatus*. *J. Heredity* **105**:910-921.
- 553
- 554 Friedman, J., and J. H. Willis. 2013. Major QTLs for critical photoperiod and vernalization  
555 underlie extensive variation in flowering in the *Mimulus guttatus* species complex. *New Phytol.*  
556 **199**:571-583.
- 557
- 558 Friedman, J., A. D. Twyford, J. H. Willis, and B. K. Blackman. 2015. The extent and genetic  
559 basis of phenotypic divergence in life history traits in *Mimulus guttatus*. *Mol. Ecol.* **24**:111-122.
- 560
- 561 Friedman, J., and M. J. Rubin. 2015. All in good time: understanding annual and perennial  
562 strategies in plants. *American Journal of Botany* **102**:497-499.
- 563
- 564 Futuyma, D. J., and G. Moreno. 1988. The evolution of ecological specialization. *Annu. Rev.*  
565 *Ecol. Syst.* **19**:207-233.
- 566
- 567 Gould, B. A., Y. Chen, and D. B. Lowry. 2017. Pooled ecotype sequencing reveals candidate  
568 genetic mechanisms for adaptive differentiation and reproductive isolation. *Mol. Ecol.* **26**:163-  
569 177.

570

571 Griffiths, M.E., and C. M. Orians. 2003. Salt spray differentially affects water status, necrosis,  
572 and growth in coastal sandplain heathland species. *Am. J. Bot.* **90**:1188–1196.

573

574 Hahn, P. G., and J. L. Maron. 2016. A framework for predicting intraspecific variation in plant  
575 defense. *Trends Ecol. Evol.* **31**:646-656.

576

577 Hall, M. C., and J. H. Willis. 2006. Divergent selection on flowering time contributes to local  
578 adaptation in *Mimulus guttatus* populations. *Evolution* **60**:2466-2477.

579

580 Hall, M. C., D. B. Lowry, and J. H. Willis. 2010. Is local adaptation in *Mimulus guttatus* caused  
581 by trade-offs at individual loci? *Mol. Ecol.* **19**:2739-2753.

582

583 Hamilton, J. G., A. R. Zangerl, E. H. DeLucia, and M. R. Berenbaum. 2001. The carbon–nutrient  
584 balance hypothesis: its rise and fall. *Ecol. Lett.* **4**:86-95.

585

586 Havko, N. E., I. T. Major, J. B. Jewell, E. Attaran, and G. A. Howe. 2016. Control of carbon  
587 assimilation and partitioning by jasmonate: An accounting of growth–defense tradeoffs. *Plants*  
588 **5**:7.

589

590 Heil, M., and I. T. Baldwin. 2002. Fitness costs of induced resistance: emerging experimental  
591 support for a slippery concept. *Trends Plant Sci.* **7**:61-67.

592

593 Hereford, J. 2009. A quantitative survey of local adaptation and fitness trade-offs. *Am. Nat.*  
594 **173**:579-588.  
595  
596 Herms, D. A., and W. J. Mattson. 1992. The dilemma of plants: to grow or defend. *Q. Rev. Biol.*  
597 **67**:283-335.  
598  
599 Holeski, L. M., K. Keefover-Ring, M. D. Bowers, Z. T. Harnenz, and R. L. Lindroth. 2013.  
600 Patterns of phytochemical variation in *Mimulus guttatus* (yellow monkeyflower). *J. Chem. Ecol.*  
601 **39**:525–536.  
602  
603 Holeski, L. M., P. Monnahan, B. Koseva, N. McCool, R. L. Lindroth, and J. K. Kelly. 2014. A  
604 high-resolution genetic map of yellow monkeyflower identifies chemical defense QTLs and  
605 recombination rate variation. *Genes Genom. Genet.* **4**:813–821.  
606  
607 Huot, B., J. Yao, B. L. Montgomery, and S. Y. He. 2014. Growth–defense tradeoffs in plants: a  
608 balancing act to optimize fitness. *Mol. Plant.* **7**:1267-1287.  
609  
610 Howe, G. A., I. T. Major, and A. J. Koo. 2018. Modularity in jasmonate signaling for multistress  
611 resilience. *Annu. Rev. Plant Biol.* **69**:387-415.  
612  
613 Hou, X., L. Ding, and H. Yu. 2013. Crosstalk between GA and JA signaling mediates plant  
614 growth and defense. *Plant Cell Rep.* **32**:1067-1074.  
615

- 616 Jensen, L.M., H. K. Jepsen, B. A. Halkier, D. J. Kliebenstein, and M. Burow. 2015 Natural  
617 variation in cross-talk between glucosinolates and onset of flowering in *Arabidopsis*. *Front. Plant*  
618 *Sci.* **6**:697.
- 619
- 620 Jia, Q., J. Zhang, S. Westcott, X-Q. Zhang, M. Bellgard, R. Lance, C. Li. 2009. GA-20 oxidase  
621 as a candidate for the semidwarf gene *sdw1/denso* in barley. *Funct. Integr. Genomics.* **9**:255–262  
622
- 623 Juenger, T. E. 2013 Natural variation and genetic constraints on drought tolerance. *Curr. Opin.*  
624 *Plant Biol.* **16**:274-281.
- 625
- 626 Karban, R. 2011. The ecology and evolution of induced resistance against herbivores. *Funct.*  
627 *Ecol.* **25**:339-347.
- 628
- 629 Kazan, K., and J. M. Manners. 2012. JAZ repressors and the orchestration of phytohormone  
630 crosstalk. *Trends Plant Sci.* **17**:22-31.
- 631
- 632 Kawecki, T. J. 1988. Red queen meets Santa Rosalia: arms races and the evolution of host  
633 specialization in organisms with parasitic lifestyles. *Am. Nat.* **152**:635-651.
- 634
- 635 Kawecki, T. J., and Ebert D. 2004. Conceptual issues in local adaptation. *Ecol. Lett.* **7**:1225-  
636 1241.
- 637
- 638 Kerwin, R., J. Feusier, J. Corwin, M. Rubin, C. Lin, A. Muok, B. Larson, B. Li, B. Joseph, M.



639 Francisco, and D. Copeland. 2015. Natural genetic variation in *Arabidopsis thaliana* defense  
640 metabolism genes modulates field fitness. *eLife*. **4**:e05604.  
641

642 Kirkpatrick, M., and N. H. Barton. 2006. Chromosome inversions, local adaptation and  
643 speciation. *Genetics* **173**:419-434.  
644

645 Kooyers, N. J. 2015. The evolution of drought escape and avoidance in natural herbaceous  
646 populations. *Plant Sci*. 234:155-162.  
647

648 Kooyers, N. J., B. K. Blackman, and L. M. Holeski. 2017 Optimal defense theory explains  
649 deviations from latitudinal herbivory defense hypothesis. *Ecology* **98**:1036-1048.  
650

651 Lowry, D. B., R. C. Rockwood, and J. H. Willis. 2008. Ecological reproductive isolation of coast  
652 and inland races of *Mimulus guttatus*. *Evolution* **62**:2196-2214.  
653

654 Lowry, D. B., M. C. Hall, D. E. Salt, and J. H. Willis. 2009. Genetic and physiological basis of  
655 adaptive salt tolerance divergence between coastal and inland *Mimulus guttatus*. *New Phytol*.  
656 **183**:776-788.  
657

658 Lowry, D. B., and J. H. Willis. 2010. A widespread chromosomal inversion polymorphism  
659 contributes to a major life-history transition, local adaptation, and reproductive isolation. *PLoS*  
660 *Biol*. **8**:e1000500.  
661

- 662 Lowry, D. B. 2012. Ecotypes and the controversy over stages in the formation of new species.  
663 Biol. J. Linnean Soc. **106**:241-257.  
664
- 665 Ludlow, M. M. 1989. Strategies of response to water stress. Pp. 509-519 in K. H. Kreeb et al.  
666 (Eds.), Structural and functional responses to environmental stresses. SPB Academic, The  
667 Hague.  
668
- 669 Lorenzo, O., J. M. Chico, J. J. Sanchez-Serrano, and R. Solano. 2004. JASMONATE-  
670 INSENSITIVE1 encodes a MYC transcription factor essential to discriminate between different  
671 jasmonate-regulated defense responses in *Arabidopsis*. Plant Cell **16**:1938–1950.  
672
- 673 Major, I. T., Y. Yoshida, M. L. Campos, G. Kapali, X. F. Xin, K. Sugimoto, D. Oliveira Ferreira,  
674 S. Y. He, and G. A. Howe. 2017. Regulation of growth–defense balance by the JASMONATE  
675 ZIM-DOMAIN (JAZ)-MYC transcriptional module. New Phytol. **215**:1533-1547.  
676
- 677 Mason, C. M., and L. A. Donovan. 2015. Evolution of the leaf economics spectrum in herbs:  
678 evidence from environmental divergences in leaf physiology across *Helianthus* (Asteraceae).  
679 Evolution **69**:2705-2720.  
680
- 681 Moreira, X., R. Zas, A. Solla, and L. Sampedro. 2015. Differentiation of persistent anatomical  
682 defensive structures is costly and determined by nutrient availability and genetic growth-defence  
683 constraints. Tree Physiol. **35**:112-123.  
684

685 Oneal, E., D. B. Lowry, K. M. Wright, Z. Zhu, and J. H. Willis. 2014. Divergent population  
686 structure and climate associations of a chromosomal inversion polymorphism across the *M*  
687 *imulus guttatus* species complex. *Mol. Ecol.* **23**:2844-2860.  
688

689 Rasmann, S., J. Sánchez Vilas, G. Glauser, M. Cartolano, J. Lempe, M. Tsiantis, and J. R.  
690 Pannell. 2018. Pleiotropic effect of the Flowering Locus C on plant resistance and defence  
691 against insect herbivores. *J. Ecol.* **106**:1244-1255.  
692

693 Rausher, M. D. 1996. Genetic analysis of coevolution between plants and their natural enemies.  
694 *Trends in Genetics* **12**:212-217.  
695

696 Rhoades, D. F. 1979. Evolution of plant chemical defense against herbivores. P.p. 3–54 in G. A.  
697 Rosenthal and D. H. Janzen, editors. *Herbivores: their interaction with secondary plant*  
698 *metabolites*. Academic Press, Orlando, Florida, USA.  
699

700 Ross J. J., and L. J. Quittenden. 2016. Interactions between brassinosteroids and gibberellins:  
701 *Synthesis or Signaling?* *Plant Cell* **28**:829-832.  
702

703 Sasaki A., M. Ashikari, M. Ueguchi-Tanaka, H. Itoh, A. Nishimura, D. Swapan, K. Ishiyama, T.  
704 Saito, M. Kobayashi, G. S. Khush, H. Kitano, and M. Matsuoka 2002. Green revolution: a  
705 mutant gibberellin-synthesis gene in rice. *Nature* **416**:701.  
706

707 Schwander, T., R. Libbrecht, and L. Keller. 2014. Supergenes and complex phenotypes. *Curr.*  
708 *Biol.* **24**:R288-R294.  
709  
710 Smilanich, A. M., R. M. Fincher, and L. A. Dyer. 2016. Does plant apparency matter? Thirty  
711 years of data provide limited support but reveal clear patterns of the effects of plant chemistry on  
712 herbivores. *New Phytol.* **210**:1044-1057.  
713  
714 Stamp, N. 2003 Out of the quagmire of plant defense hypotheses. *Q. Rev. Biol.* **78**:23-55.  
715  
716 Strauss, S.Y., J.A. Rudgers, J.A. Lau, and R.E. Irwin. 2002. Direct and ecological costs of  
717 resistance to herbivory. *Trends Ecol. Evol.* **17**:278-285.  
718  
719 Stowe, K. A., and R. J. Marquis. 2011. Costs of defense: correlated responses to divergent  
720 selection for foliar glucosinolate content in *Brassica rapa*. *Evol. Ecol.* **25**:763-775.  
721  
722 Svanbäck, R., and P. Eklöv. 2003. Morphology dependent foraging efficiency in perch: a trade-  
723 off for ecological specialization? *Oikos* **102**:273-284.  
724  
725 Twyford, A. D., and J. Friedman. 2015. Adaptive divergence in the monkey flower *Mimulus*  
726 *guttatus* is maintained by a chromosomal inversion. *Evolution* **69**:1476-1486.  
727

728 Uesugi, A., T. Connallon, A. Kessler, and K. Monro, 2018. Relaxation of herbivore-mediated  
729 selection drives the evolution of genetic covariances between plant competitive and defense  
730 traits. *Evolution* **71**:1700-1709.  
731

732 Unterholzner, S. J., W. Rozhon, and B. Poppenberger. 2016. Reply: Interaction between  
733 Brassinosteroids and Gibberellins: Synthesis or Signaling? In *Arabidopsis, Both!* *Plant Cell*.  
734 **28**:836-839.  
735

736 van Dam, N. M., and I. T. Baldwin. 1998. Costs of jasmonate-induced responses in plants  
737 competing for limited resources. *Ecol. Lett.* **1**:30-33.  
738

739 Wellenreuther, M., and L. Bernatchez. 2018. Eco-evolutionary genomics of chromosomal  
740 inversions. *Trends Ecol. Evol.* **33**:427-440.  
741

742 Whitlock, M. C. 1996. The red queen beats the jack-of-all-trades: the limitations on the evolution  
743 of phenotypic plasticity and niche breadth. *Am. Nat.* **148**:S65-S77.  
744

745 Whittaker, R. H. 1975. *Communities and Ecosystems*. McMillan, New York, NY.  
746

747 Yan, Y., S. Stolz, A. Chetelat, P. Reymond, M. Pagni, L. Dubugnon, and E. E. Farmer. 2007. A  
748 downstream mediator in the growth repression limb of the jasmonate pathway. *Plant Cell*  
749 **19**:2470–2483.  
750

751 Yang, D. L., J. Yao, C. S. Mei, X. H. Tong, L. J. Zeng, Q. Li, L. T. Xiao, T. P. Sun, J. Li, X. W.  
752 Deng, C. M. Lee, M. F. Thomashow, Y. Yang, Z. He, S. Y. He. 2012. Plant hormone jasmonate  
753 prioritizes defense over growth by interfering with gibberellin signaling cascade. Proc. Nat.  
754 Acad. Sci. **109**:E1192-1200.

755

756 Zhang, Y., and J. Turner. 2008. Wound-induced endogenous jasmonates stunt plant growth by  
757 inhibiting mitosis. PLoS ONE **3**:e3699.

758

759

760

761

762

763

764

765

766

767

768

769

770

771

772

773

774 **TABLES**

775 **Table 1.** F-values for main effects and interactions on traits measured across population

776 accessions.

| Trait                                          | N   | Population | Ecotype    | Treatment  | Population x Treatment | Ecotype x Treatment |
|------------------------------------------------|-----|------------|------------|------------|------------------------|---------------------|
| PC1                                            | 208 | 22.33****  | 333.64**** | 12.84***   | 3.27**                 | 1.65                |
| PC2                                            | 208 | 16.18****  | 1.54       | 52.41****  | 9.30****               | 11.70***            |
| PC3                                            | 208 | 17.41****  | 2.67       | 54.93****  | 3.07**                 | 62.66****           |
| <b>Traits Measured at Flowering</b>            |     |            |            |            |                        |                     |
| Total number of nodes on the primary shoot     | 248 | 20.63****  | 249.51**** | 25.94****  | 0.89                   | 11.71***            |
| Length of the 1st internode                    | 248 | 15.51****  | 40.98****  | 0.02       | 0.45                   | 0.53                |
| Length of the 2nd internode                    | 248 | 35.03****  | 127.59**** | 35.70****  | 2.32*                  | 0.79                |
| Length of the 3rd internode                    | 248 | 27.67****  | 0.27       | 18.47****  | 1.68                   | 0.01                |
| Combined length first three internodes         | 248 | 36.71****  | 31.14****  | 35.15****  | 1.55                   | 0.12                |
| Plant Height                                   | 248 | 32.12****  | 187.20**** | 100.61**** | 5.27****               | 25.68****           |
| Width 1st internode                            | 248 | 9.59****   | 153.67**** | 0.93       | 0.30                   | 0.80                |
| Width 2nd internode                            | 248 | 36.32****  | 571.28**** | 5.36*      | 2.12*                  | 0.12                |
| Width 3rd internode                            | 248 | 29.73****  | 538.28**** | 0.85       | 5.28****               | 2.16                |
| Corolla length of the 1st flower               | 248 | 56.05****  | 629.66**** | 16.95****  | 1.48                   | 1.36                |
| Corolla width of the 1st flower                | 248 | 31.87****  | 303.07**** | 17.69****  | 2.71*                  | 2.15                |
| Number of adventitious roots at 1st nodes      | 248 | 4.30**     | 80.55****  | 7.68**     | 1.50                   | 3.77                |
| Number of nodes with adventitious roots        | 248 | 4.47****   | 9.16**     | 6.75*      | 1.88                   | 4.00*               |
| Total number of aerial branches                | 248 | 12.65****  | 19.28****  | 33.91****  | 8.69****               | 9.32**              |
| Total number of stolons                        | 248 | 8.37****   | 66.82****  | 30.61****  | 1.78                   | 21.44****           |
| Length of the longest aerial branch            | 248 | 19.02****  | 68.57****  | 34.38****  | 3.80***                | 18.34****           |
| Length of the longest stolon                   | 248 | 5.32****   | 23.80****  | 4.19*      | 1.47                   | 3.94*               |
| Length of the longest leaf at the 2nd node     | 248 | 3.79***    | 111.60**** | 1.91       | 1.44                   | 0.45                |
| Width of the longest leaf at the 2nd node      | 248 | 4.88****   | 50.95****  | 28.75****  | 1.91                   | 4.25*               |
| <b>Traits Measured 10 Days After Flowering</b> |     |            |            |            |                        |                     |
| Total number of nodes on the primary shoot     | 216 | 19.75****  | 167.07**** | 8.41**     | 2.44*                  | 0.82                |
| Length of the 1st internode                    | 215 | 16.88****  | 92.96****  | 0.23       | 2.32*                  | 2.78*               |
| Length of the 2nd internode                    | 215 | 30.52****  | 108.15**** | 36.67****  | 1.53                   | 0.78                |
| Length of the 3rd internode                    | 215 | 32.82****  | 0.00       | 12.54***   | 2.17*                  | 0.81                |
| Combined length first three internodes         | 215 | 39.46****  | 31.62****  | 24.54****  | 1.77                   | 0.37                |
| Plant Height                                   | 215 | 28.85****  | 181.38**** | 56.07****  | 12.74****              | 0.31                |
| Width 1st internode                            | 215 | 3.79*      | 52.44****  | 1.75       | 1.79                   | 0.00                |
| Width 2nd internode                            | 215 | 19.87****  | 295.50**** | 10.51**    | 5.29****               | 0.03                |
| Width 3rd internode                            | 215 | 19.43****  | 470.47**** | 0.54       | 3.55**                 | 0.49                |
| Number of adventitious roots at 1st nodes      | 214 | 4.93****   | 71.24****  | 34.29****  | 3.79***                | 18.39****           |
| Number of nodes with adventitious roots        | 214 | 5.76****   | 43.85****  | 45.64****  | 5.02****               | 40.20****           |
| Total number of aerial branches                | 215 | 10.51****  | 0.03       | 70.45****  | 5.39****               | 30.07****           |
| Total number of stolons                        | 215 | 8.68****   | 115.03**** | 82.04****  | 5.37****               | 36.71****           |
| Length of the longest aerial branch            | 214 | 7.16****   | 15.46****  | 8.13**     | 9.04****               | 12.37***            |
| Length of the longest stolon                   | 215 | 2.78**     | 34.63****  | 7.56**     | 0.79                   | 4.98*               |
| Length of the longest leaf at the 2nd node     | 215 | 3.29**     | 53.75****  | 3.35       | 1.97                   | 2.99                |
| Width of the longest leaf at the 2nd node      | 214 | 3.01**     | 21.70****  | 41.65****  | 2.17*                  | 10.80**             |
| Number of flowers                              | 212 | 8.99****   | 13.01***   | 0.27       | 1.80                   | 0.68                |

P-values: \*<0.05, \*\*<0.01, \*\*\*<0.001, \*\*\*\*<0.0001

777

778 **Table 2.** F-values for main effects and interactions on traits measured on coastal perennial  
 779 (SWB) and inland annual (LMC) parents as well as near-isogenic lines of the *DIVI* inversion in  
 780 the coastal genetic background.

| Trait                                          | N   | Line       | Treatment  | Line x Treatment |
|------------------------------------------------|-----|------------|------------|------------------|
| PC1                                            | 176 | 35.44****  | 16.76****  | 3.66             |
| PC2                                            | 176 | 2.55       | 391.46**** | 4.13*            |
| PC3                                            | 176 | 37.55****  | 1.46       | 4.17*            |
| <b>Traits Measured at Flowering</b>            |     |            |            |                  |
| Total number of nodes on the primary shoot     | 253 | 35.90****  | 26.61****  | 5.39*            |
| Length of the 1st internode                    | 251 | 7.84**     | 2.95       | 1.03             |
| Length of the 2nd internode                    | 252 | 81.97****  | 68.15****  | 13.00***         |
| Length of the 3rd internode                    | 252 | 83.51****  | 19.07****  | 0.15             |
| Combined length first three internodes         | 252 | 91.13**    | 48.44****  | 2.41             |
| Plant Height                                   | 252 | 1.80       | 100.13**** | 0.90             |
| Width 1st internode                            | 252 | 20.13****  | 13.48***   | 5.19*            |
| Width 2nd internode                            | 252 | 47.81****  | 0.34       | 7.94**           |
| Width 3rd internode                            | 252 | 98.32****  | 0.84       | 5.76*            |
| Corolla length of the 1st flower               | 250 | 24.27****  | 1.99       | 1.47             |
| Corolla width of the 1st flower                | 252 | 109.77**** | 87.27****  | 1.71             |
| Number of adventitious roots at 1st nodes      | 245 | 7.94**     | 27.46****  | 5.40*            |
| Number of nodes with adventitious roots        | 245 | 3.73       | 10.17**    | 6.39*            |
| Total number of aerial branches                | 249 | 36.33****  | 132.42**** | 15.87****        |
| Total number of stolons                        | 249 | 0.07       | 286.82**** | 3.46             |
| Length of the longest aerial branch            | 249 | 3.76       | 35.68****  | 4.64*            |
| Length of the longest stolon                   | 249 | 0.33       | 25.17****  | 0.08             |
| Length of the longest leaf at the 2nd node     | 248 | 11.78***   | 7.58**     | 0.61             |
| Width of the longest leaf at the 2nd node      | 248 | 1.60       | 21.35****  | 0.04             |
| <b>Traits Measured 10 Days After Flowering</b> |     |            |            |                  |
| Total number of nodes on the primary shoot     | 204 | 6.79**     | 39.53****  | 1.78             |
| Length of the 1st internode                    | 205 | 8.74**     | 13.46***   | 5.79*            |
| Length of the 2nd internode                    | 205 | 132.59**** | 123.94**** | 20.97****        |
| Length of the 3rd internode                    | 204 | 93.44****  | 8.32**     | 0.00             |
| Combined length first three internodes         | 204 | 95.41****  | 38.86****  | 2.80             |
| Plant Height                                   | 205 | 5.42*      | 136.75**** | 0.12             |
| Width 1st internode                            | 204 | 5.89*      | 1.27       | 2.35             |
| Width 2nd internode                            | 204 | 30.62****  | 1.36       | 4.16*            |
| Width 3rd internode                            | 204 | 76.93****  | 1.09       | 10.24**          |
| Number of adventitious roots at 1st nodes      | 204 | 0.03       | 76.60****  | 0.09             |
| Number of nodes with adventitious roots        | 204 | 0.11       | 81.51****  | 0.04             |
| Total number of aerial branches                | 203 | 43.80****  | 160.41**** | 28.46****        |
| Total number of stolons                        | 204 | 3.92*      | 226.09**** | 0.00             |
| Length of the longest aerial branch            | 204 | 0.05       | 32.21****  | 2.36             |
| Length of the longest stolon                   | 204 | 0.20       | 23.36****  | 0.00             |
| Length of the longest leaf at the 2nd node     | 204 | 12.11***   | 14.26***   | 0.67             |
| Width of the longest leaf at the 2nd node      | 204 | 0.88       | 17.47****  | 0.05             |
| Number of flowers                              | 200 | 0.59       | 0.62       | 0.59             |

P-values: \*<0.05, \*\*<0.01, \*\*\*<0.001, \*\*\*\*<0.0001

781



782 **Table 3.** Means and standard errors for the concentrations of phenylpropanoid glycosides in  
783 coastal perennial (SWB) and inland annual (LMC) parents as well as near-isogenic lines of the  
784 *DIVI* inversion in the coastal genetic background.

| Trait             | Coastal Parent | Inland Parent  | Control NIL    | Introgression NIL |
|-------------------|----------------|----------------|----------------|-------------------|
| Total PPGs        | 164.24 (7.74)A | 65.65 (13.69)C | 161.32 (5.27)A | 119.67 (6.55)B    |
| Conandroside      | 105.11 (6.65)A | 42.26 (11.75)B | 106.98 (4.52)A | 55.71 (5.62)B     |
| Calceolarioside A | 37.15 (2.13)B  | 12.79 (3.77)C  | 32.77 (1.45)B  | 46.30 (1.80)A     |
| Mimuloside        | 7.93 (0.64)A   | 3.62 (1.13)B   | 7.54 (0.43)A   | 4.24 (0.55)B      |
| Verbascoside      | 6.91 (0.36)A   | 1.90 (0.63)B   | 6.89 (0.24)A   | 5.90 (0.30)A      |
| Calceolarioside B | 0.98 (0.08)A   | 0.33 (0.13)B   | 0.66 (0.06)B   | 0.62 (0.06)B      |
| Unknown PPG 16    | 5.52 (0.44)A   | 4.56 (0.77)A   | 5.87 (0.30)A   | 6.09 (0.37)A      |
| Unknown PPG10     | 0.64 (0.04)B   | 0.19 (0.07)C   | 0.60 (0.03)B   | 0.81 (0.03)A      |

Mean (SE) and Tukey HSD post-hoc results

785

786

## 787 **FIGURE LEGENDS**

788 **Figure 1.** A) Map of coastal perennial (blue), inland annual (yellow), and inland perennial  
789 (green) populations from where accessions for experiment were derived. B) Effects of the  
790 introgression of the inland *DIVI* inversion orientation into the coastal perennial genetic  
791 background. Left: Coastal perennial parental inbred line. Center: Control Near Isogenic Line  
792 (NIL) containing the coastal orientation of the inversion. Right: Introgression NIL containing the  
793 inland orientation of the inversion. All three plants germinated on the same day. C) Differential  
794 responses of inland annual and coastal perennial accessions to gibberellin treatment and water  
795 control (mock).

796

797 **Figure 2.** Box and whisker plots of trait responses by coastal perennial, inland annual, and inland  
798 perennial accessions to mock and gibberellin treatments.

799

800 **Figure 3.** Box and whisker plots of trait responses by coastal perennial (SWB) and inland annual  
801 (LMC) parents as well as coastal perennial genetic background near-isogenic lines (NILs) to  
802 mock and gibberellin treatments. The introgression NILs were homozygous for the inland annual  
803 orientation of the *DIVI* inversion, while the control NILs were homozygous for the coastal  
804 perennial orientation of the *DIVI* inversion.

805

806 **Figure 4.** Concentration of phenylpropanoid glycosides for coastal perennial (SWB) and inland  
807 annual (LMC) parents as well as coastal perennial genetic background near-isogenic lines  
808 (NILs). The introgression NILs were homozygous for the inland annual orientation of the *DIVI*  
809 inversion, while the control NILs were homozygous for the coastal perennial orientation of the  
810 *DIVI* inversion.

811

A

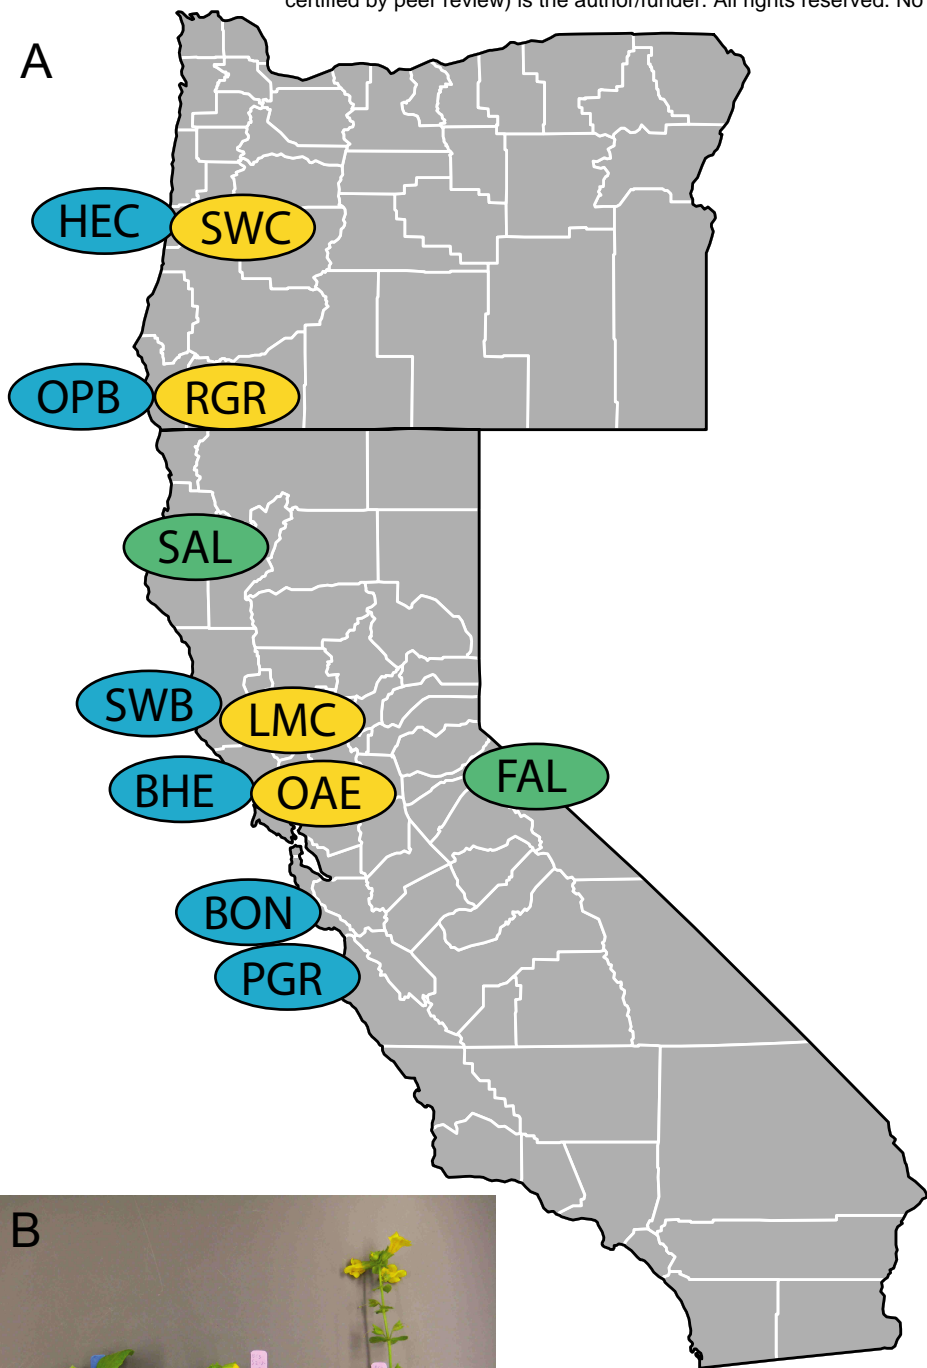

B

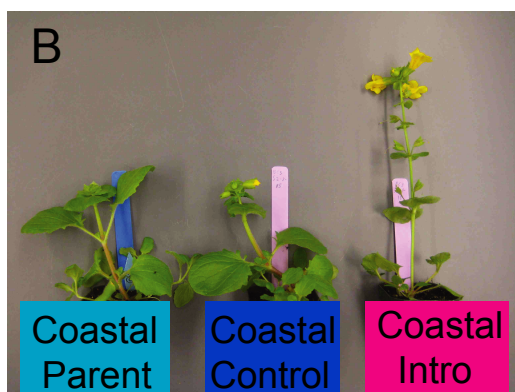

C

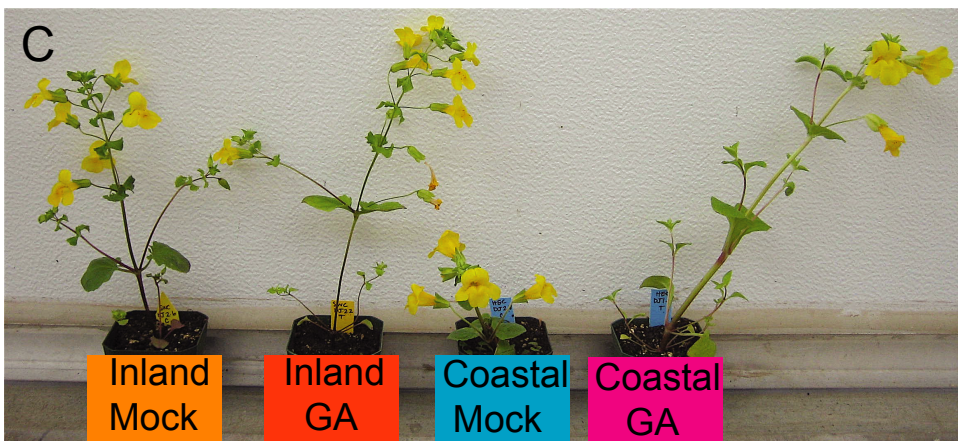

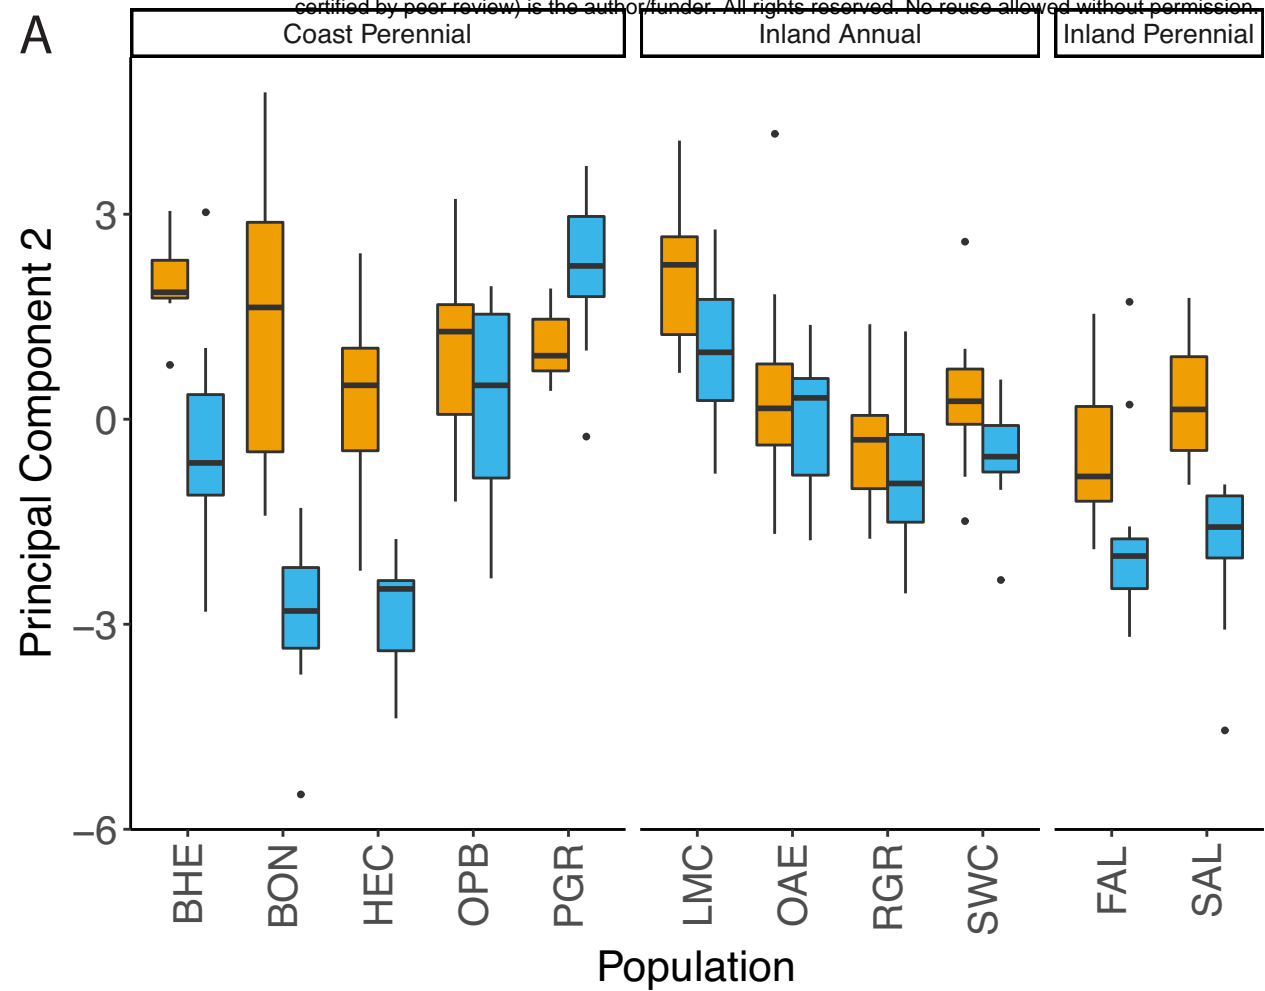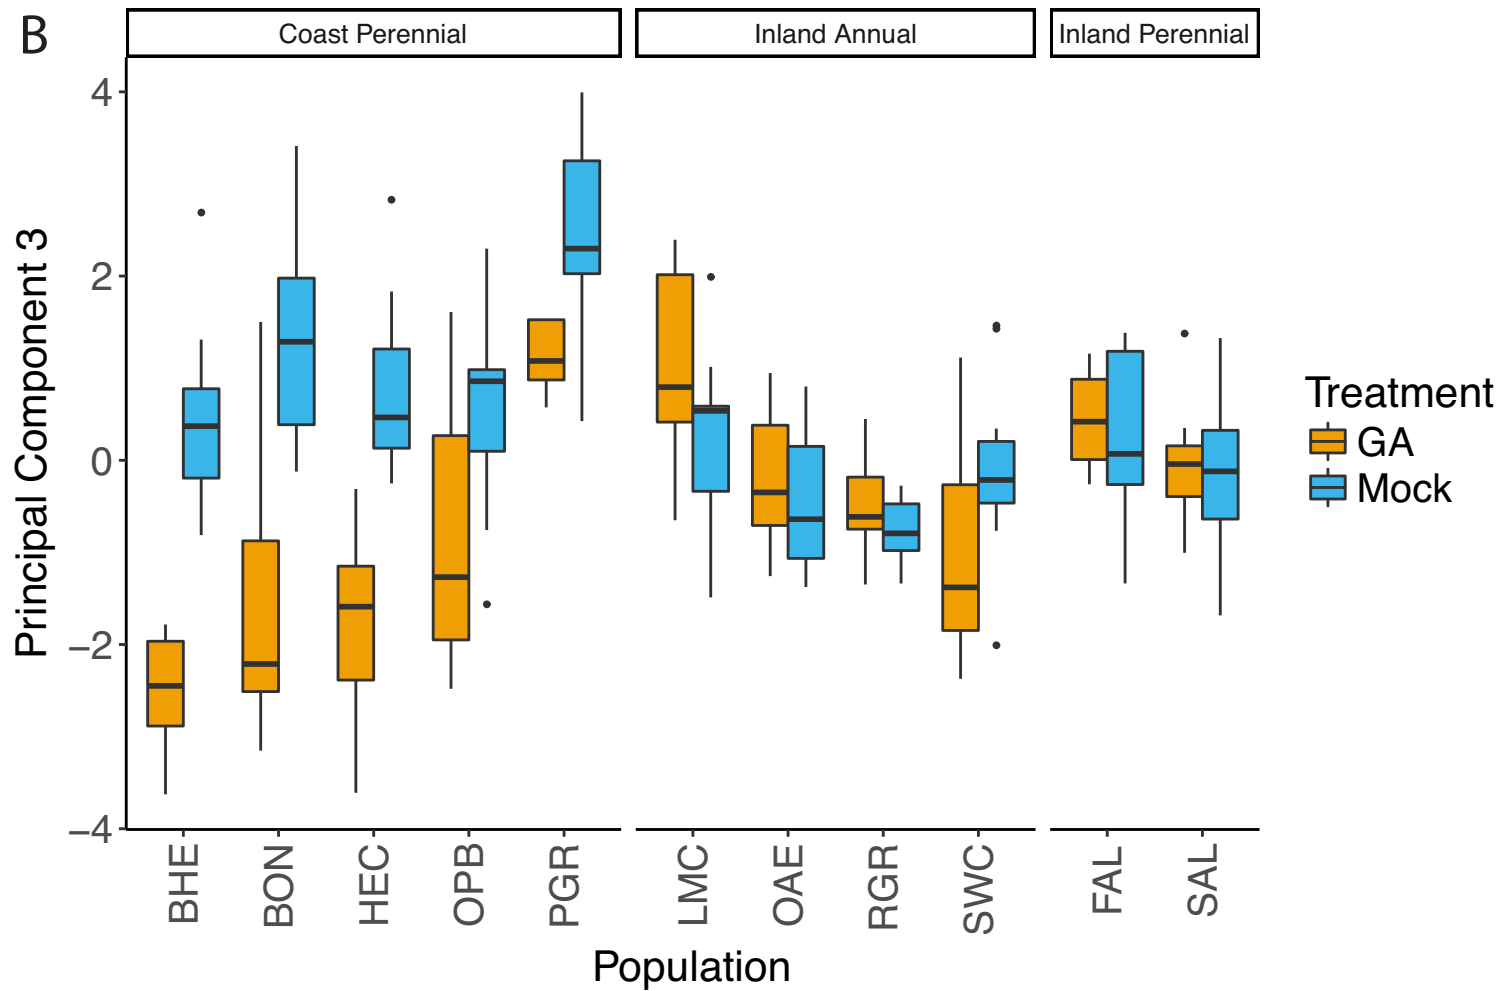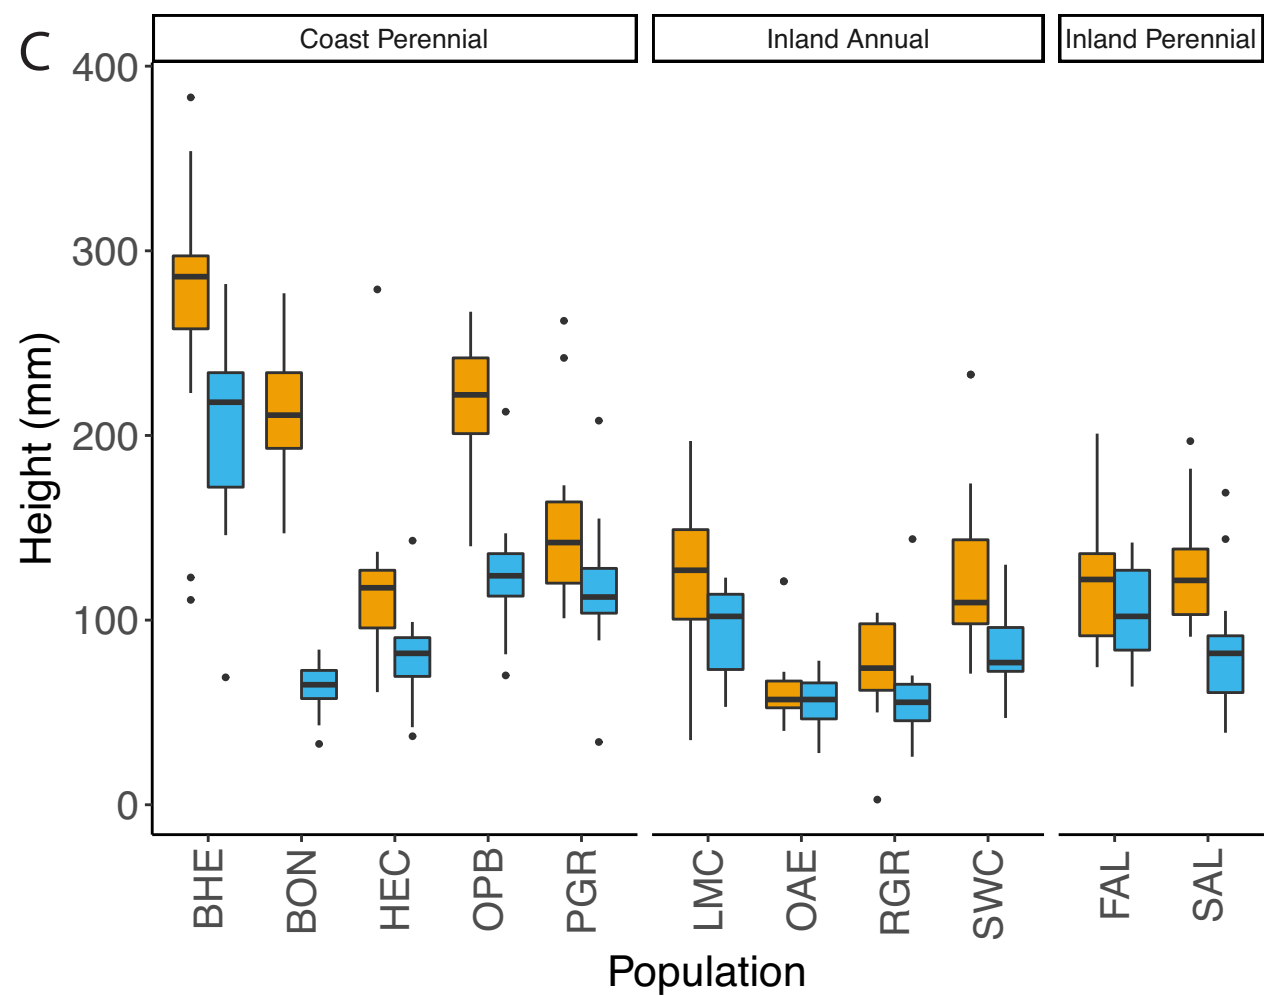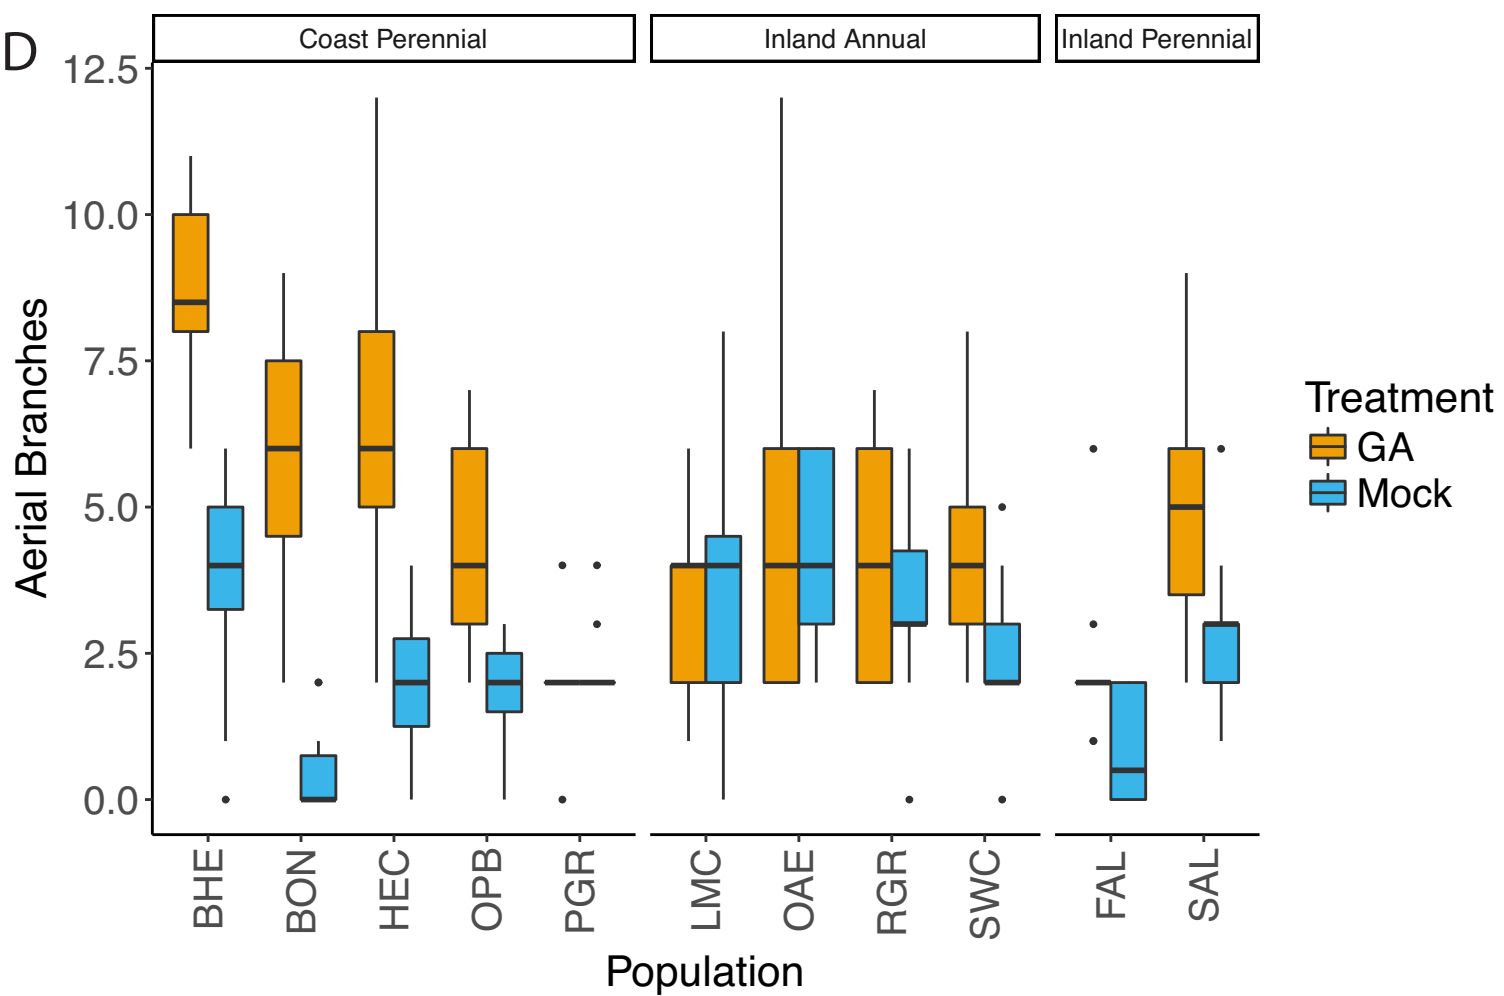

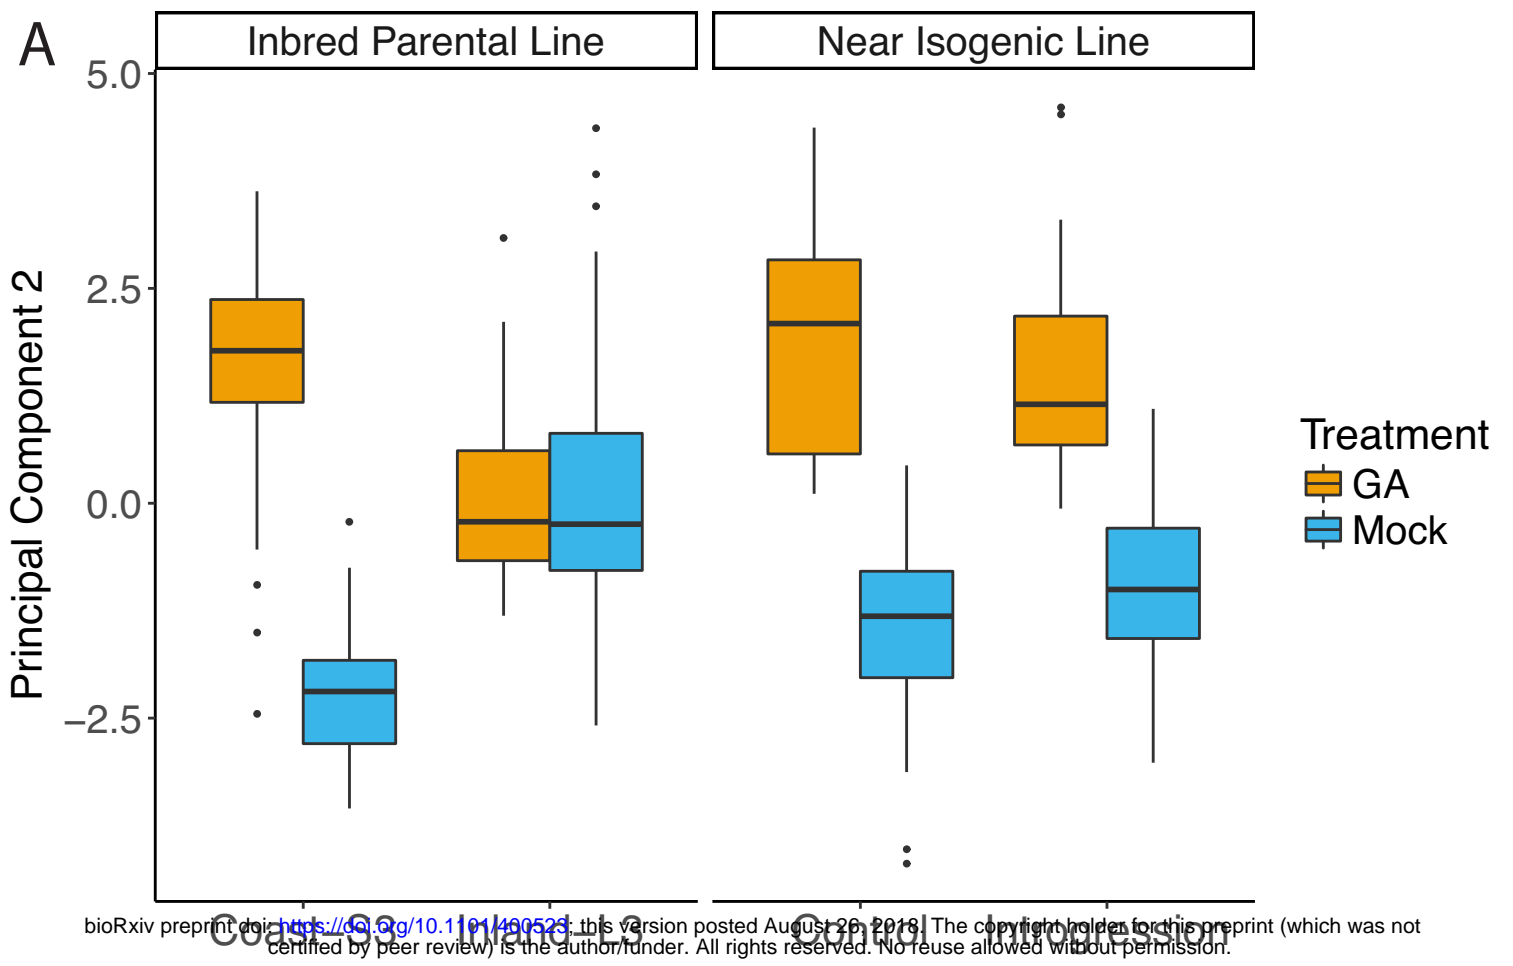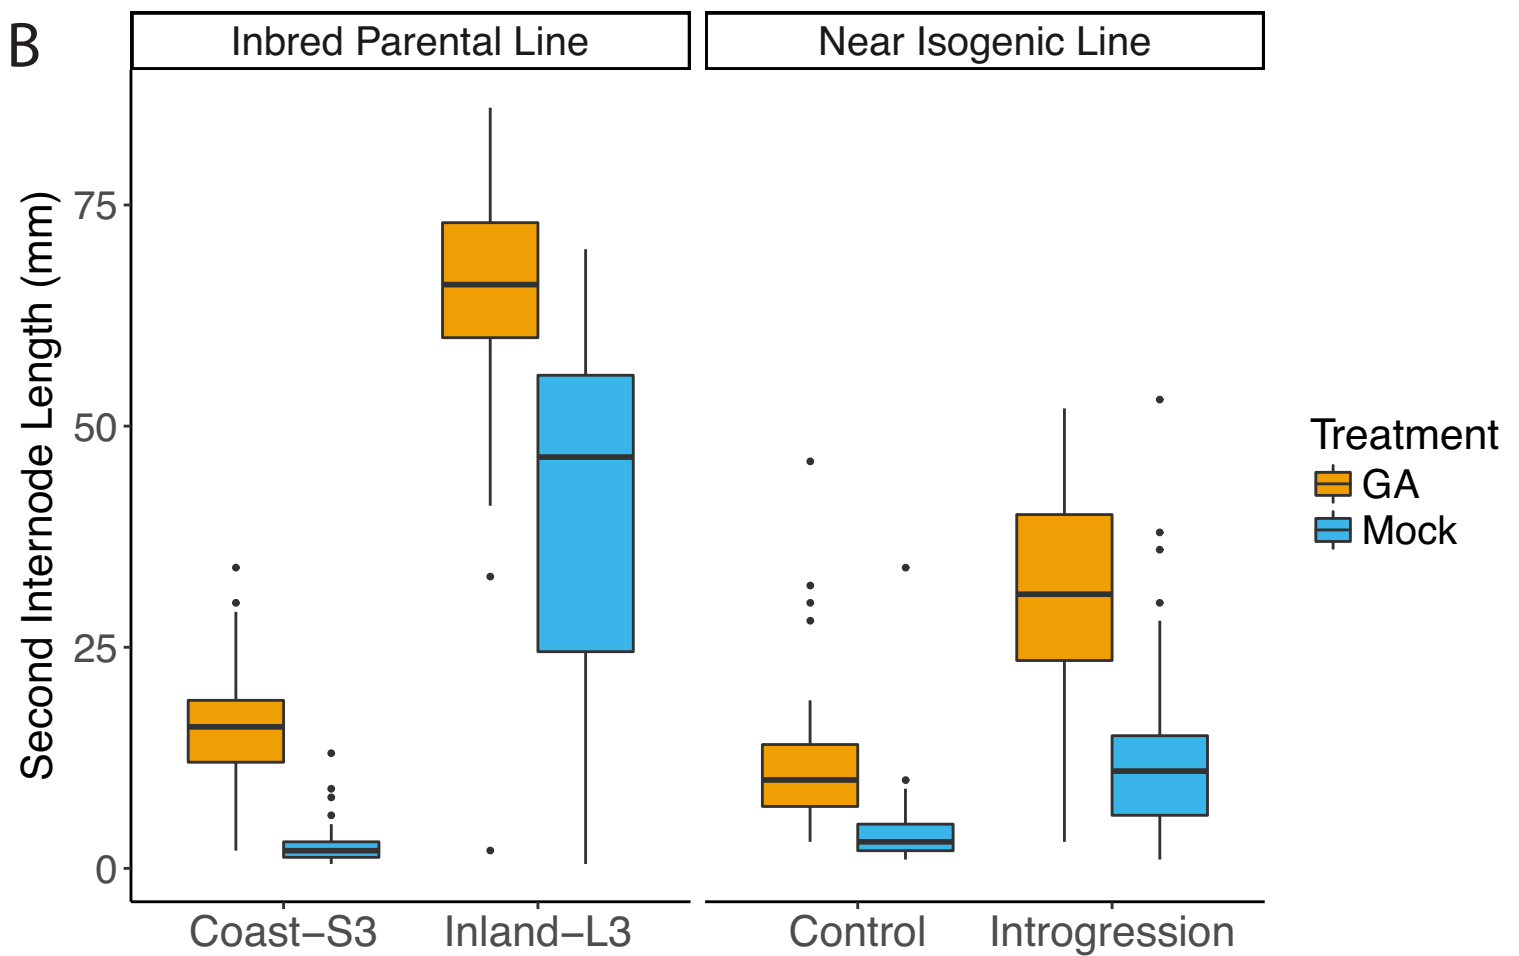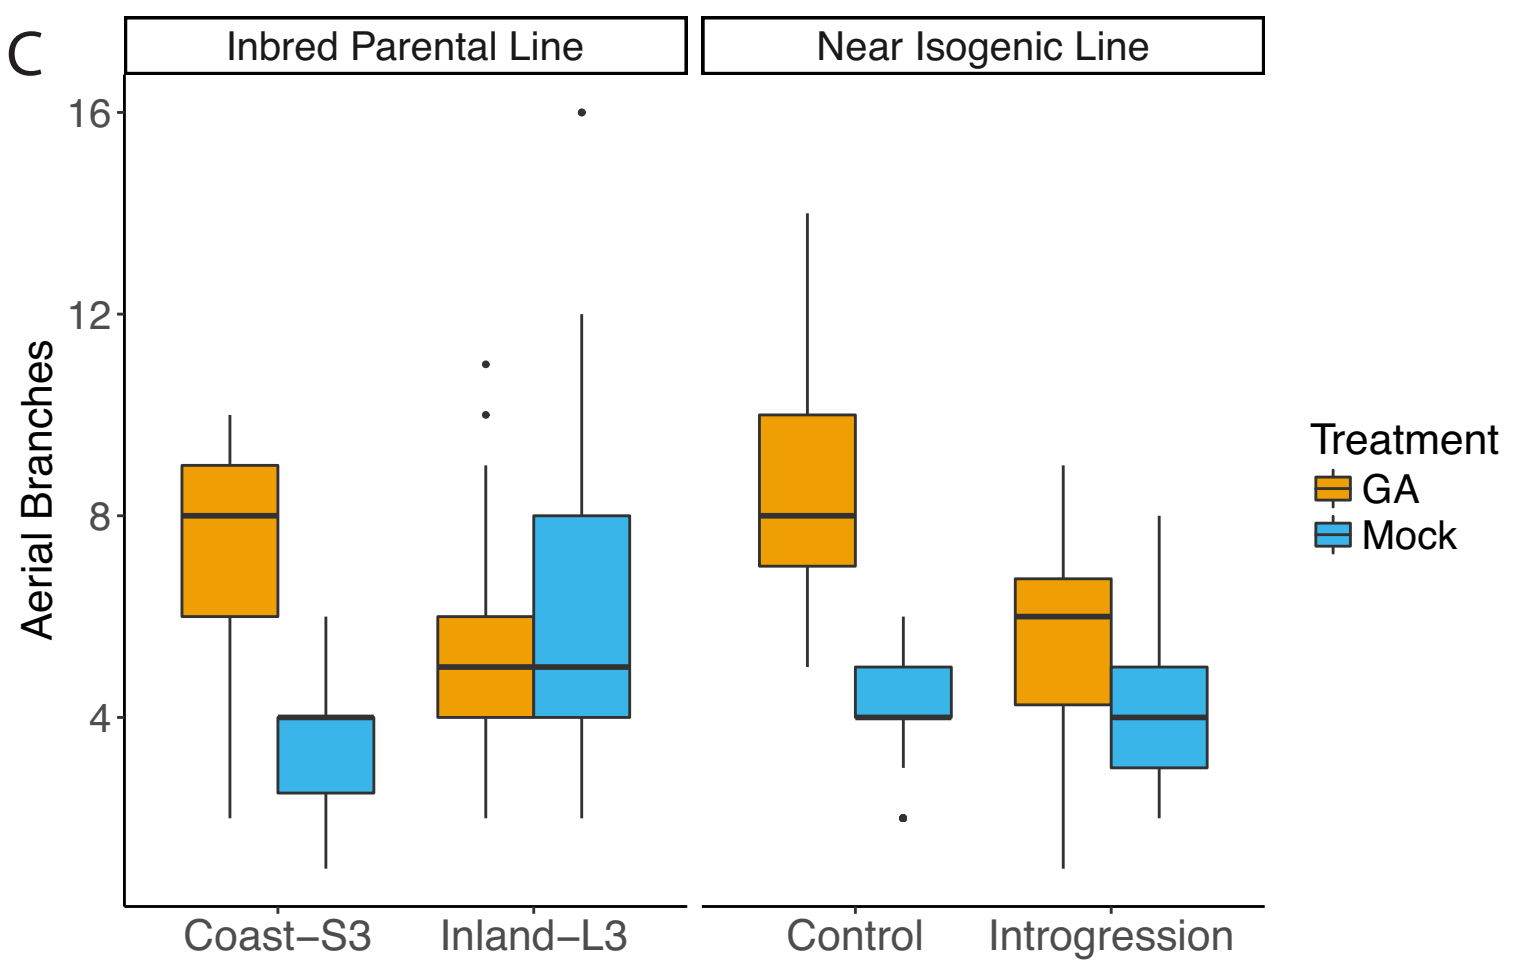

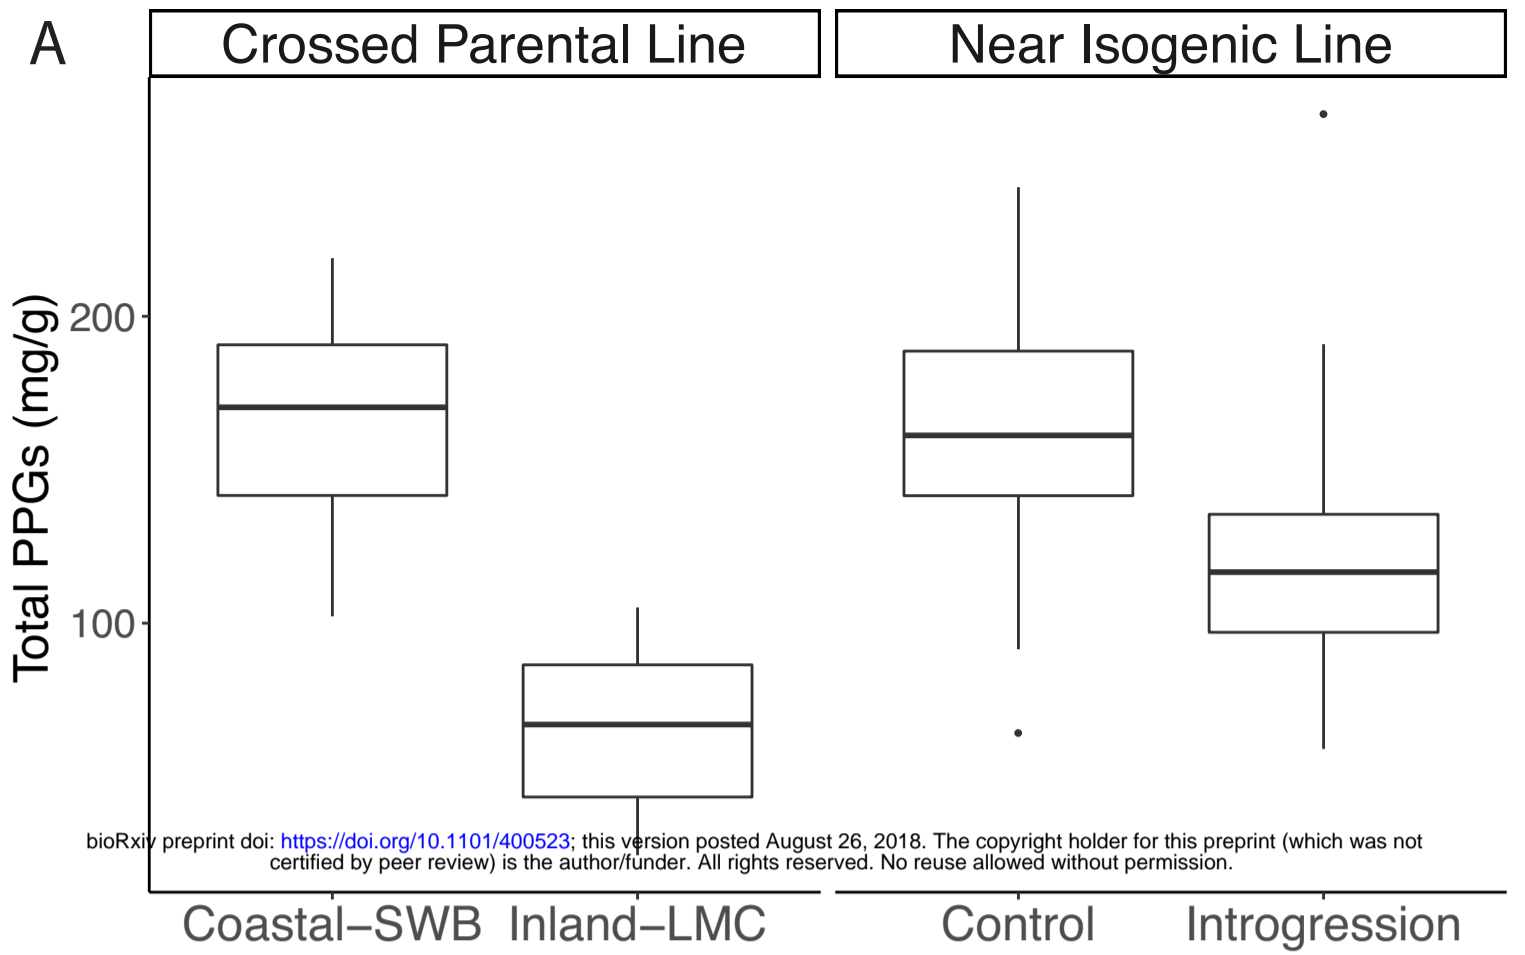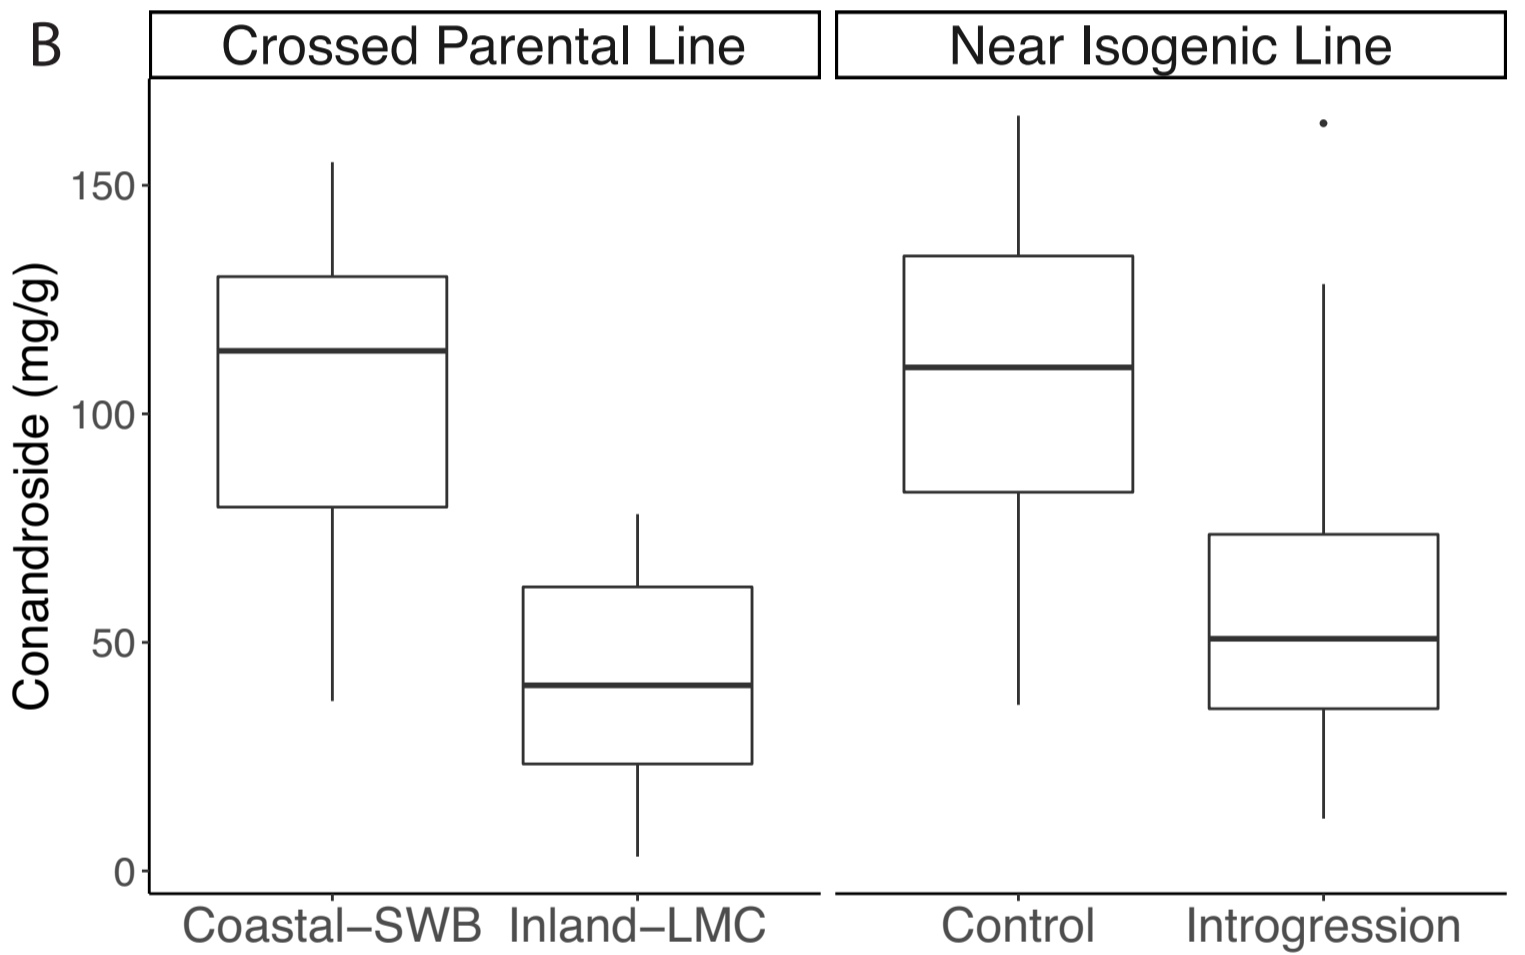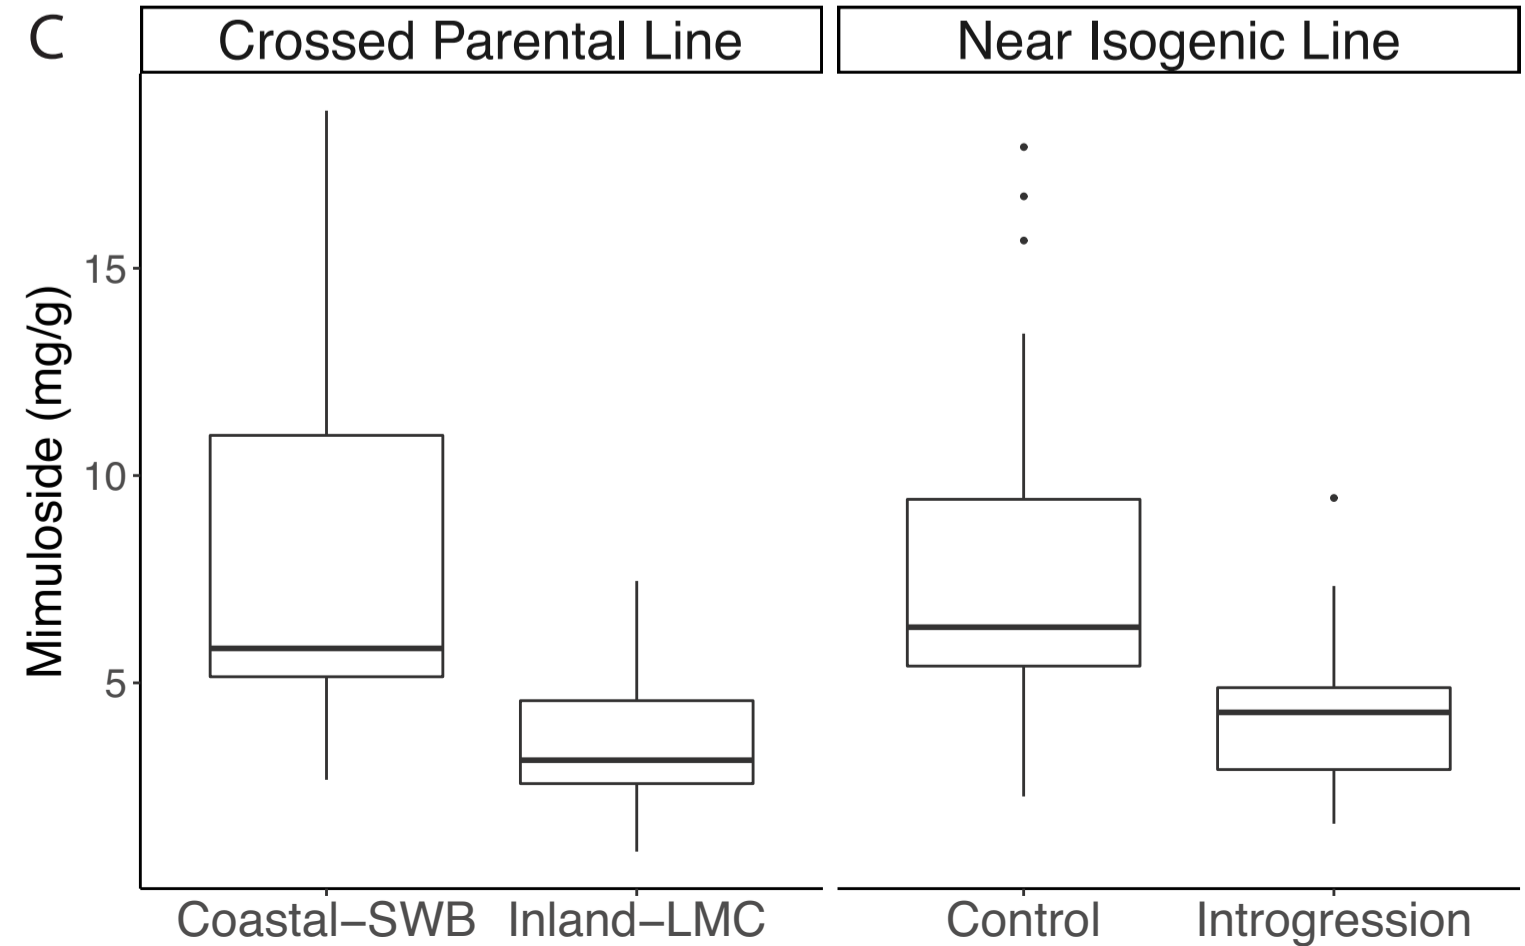

Source: http://biorxiv.org/content/10.1101/400523v1.full.pdf
